1  
2  
3  
4  
5 **Connexin-46/50 in a dynamic lipid environment**  
6 **resolved by CryoEM at 1.9 Å**

7  
8  
9 **Authors:** Jonathan A. Flores<sup>1,2,†</sup>, Bassam G. Haddad<sup>1,†</sup>, Kimberly A. Dolan<sup>1,3,†</sup>, Janette B. Myers<sup>1</sup>,  
10 Craig C. Yoshioka<sup>4</sup>, Jeremy Copperman<sup>4</sup>, Daniel M. Zuckerman<sup>4</sup> and Steve L. Reichow<sup>1,2,\*</sup>

11  
12  
13  
14 **Affiliations:**

15  
16 <sup>1</sup> Department of Chemistry, Portland State University, Portland OR 97201, U.S.A.

17  
18 <sup>2</sup> Department of Chemical Physiology and Biochemistry, Oregon Health and Science University,  
19 Portland OR 97239, U.S.A.

20  
21 <sup>3</sup> Current Address: Biophysics Graduate Group, University of California, Berkeley, CA 94720,  
22 U.S.A.

23  
24 <sup>4</sup> Department of Biomedical Engineering, Oregon Health and Science University, Portland OR  
25 97239, U.S.A.

26  
27 † equal contribution

28  
29 \* corresponding author (reichow@pdx.edu)

30  
31

## 32 **Abstract**

33 Gap junctions establish direct pathways for connected cells and tissues to transfer metabolic and  
34 electrical messages<sup>1</sup>. The local lipid environment is known to affect the structure, stability and  
35 intercellular channel activity of gap junctions<sup>2-5</sup>; however, the molecular basis for these effects  
36 remains unknown. To gain insight toward how gap junctions interact with their local membrane  
37 environment, we used lipid nanodisc technology to incorporate native connexin-46/50 (Cx46/50)  
38 intercellular channels into a dual lipid membrane system, closely mimicking a native cell-to-cell  
39 junction. Structural characterization of Cx46/50 lipid-embedded channels by single particle  
40 CryoEM revealed a lipid-induced stabilization to the channel, resulting in a 3D reconstruction at  
41 1.9 Å resolution. Together with all-atom molecular dynamics (MD) simulations and 3D  
42 heterogeneity analysis of the ensemble CryoEM data, it is shown that Cx46/50 in turn imparts  
43 long-range stabilization to the dynamic local lipid environment that is specific to the extracellular  
44 lipid leaflet of the two opposed membranes. In addition, nearly 400 water molecules are resolved  
45 in the CryoEM map, localized throughout the intercellular permeation pathway and contributing to  
46 the channel architecture. These results illustrate how the aqueous-lipid environment is integrated  
47 with the architectural stability, structure and function of gap junction communication channels,  
48 and demonstrates the ability of CryoEM to effectively characterize dynamical protein-lipid  
49 interactions.

50

## 51 **Main**

52 The connexins are a family of transmembrane proteins (21 isoforms in human) that form  
53 intercellular channels for cell-to-cell communication<sup>6</sup>. These intercellular channels establish a  
54 ~1.4 nm pore that couples the cytoplasm of neighboring cells, and enable direct passage of  
55 electrical and small molecule signals (such as, ions, second messengers, hormones and  
56 metabolites)<sup>7</sup> and therapeutic agents<sup>8</sup>. 10's – 1000's of connexin channels may assemble  
57 together to form large hexagonally packed arrays, *a.k.a.* plaques, known as gap junctions. In this  
58 way, gap junctions enable the near instantaneous response of electrical synapses in the brain  
59 and heart, and contribute to the long-range signaling and metabolic coupling of most tissues.  
60 Because of these fundamental roles, aberrant gap junctional coupling is associated with a variety  
61 of human diseases, including blindness, deafness, skin disorders, arrhythmia, stroke and  
62 cancers<sup>9-11</sup>.

63

64 Gap junction intercellular communication is facilitated by a unique macromolecular architecture,  
65 where intercellular channels directly couple the plasma membranes of two neighboring cells. The

66 lipid bilayers of opposing cells are separated by a characteristic gap of  $\sim 3.5$  nm<sup>12</sup>, a feature for  
67 which these structures were first recognized in electron micrographs of cell sections<sup>5,13</sup>.  
68 Furthermore, large-scale gap junctional plaque formation is dependent upon a dense mosaic of  
69 protein-lipid interactions. *In vitro* reconstitution studies have established that plaque assembly  
70 and intercellular channel function are dependent on the lipid environment<sup>2,14,15</sup>. However, the  
71 molecular basis for these effects remain largely unknown, due to the lack of high-resolution  
72 structural information within a lipid bilayer.

73  
74 Here, we present a CryoEM structure of native connexin-46/50 (Cx46/50) intercellular channels  
75 stabilized in a dual lipid nanodisc system at 1.9 Å resolution – providing an unprecedented level  
76 of detail for this class of membrane channels. These structural results are coupled with all-atom  
77 molecular dynamics (MD) simulation studies, which together reveal many new features of the  
78 connexin channels. Cx46/50 is shown to have a remarkable influence on the local lipid  
79 environment, effectively inducing a phase separation (to the gel state) that is specific to the  
80 extracellular lipid leaflet of the two opposed membranes. 3D heterogeneity analysis of the CryoEM  
81 data identified multiple lipid configurations that co-exist within the dynamic lattice of stabilized  
82 lipids, which is further detailed by MD. In addition,  $\sim 400$  water molecules are resolved in the  
83 CryoEM map, localized at architectural and functionally important sites. Together this work  
84 uncovers previously unrecognized roles of the aqueous-lipid environment in stabilizing the  
85 structure and assembly of the gap junctions, and suggest Cx46/50 plays an important role in  
86 shaping the properties of local membrane environment.

### 87 88 **Structural overview of connexin-46/50 in a dual lipid bilayer**

89 Native (heteromeric/heterotypic) connexin-46/50 intercellular channels were purified from  
90 mammalian lens tissue (obtained from sheep), as previously described<sup>16</sup>. Freshly purified  
91 channels were reconstituted into self-assembling lipid nanodiscs containing pure dimyristoyl  
92 phosphatidylcholine (DMPC) at room temperature ( $\sim 25^\circ$  C), supported by the membrane scaffold  
93 protein MSP1E1<sup>17</sup> (see Methods). Under optimized conditions, the reconstitution resulted in a  
94 monodispersed population of intercellular channels embedded into a pair of lipid-nanodiscs, as  
95 assessed by size-exclusion chromatography and negative stain EM (Extended Data Fig. 1).

96  
97 Structure determination by high-resolution single particle CryoEM resulted in a high-quality 3D  
98 reconstruction, with an overall resolution of 1.9 Å (gold-standard FSC) (Fig. 1a,b, Extended Data  
99 Fig. 2,3 and Supplemental Movie 1). The quality of the CryoEM map allowed for detailed stereo-

100 chemical structural refinement of both Cx46 and Cx50 (Fig. 1b, Extended Data Table 1 and  
101 Extended Data Fig. 3). The heteromeric pattern(s) of Cx46/50 co-assembly remain unresolved,  
102 following various attempts at computational image classification (see Methods). Nevertheless,  
103 atomic models of both Cx50 and Cx46 isoforms were equally well-fit into the D6-symmetrized  
104 CryoEM map, reflecting their close sequence and structural similarities, 89% sequence similarity  
105 over the structured regions and a resulting 0.16 Å backbone r.m.s.d. (see Methods and Extended  
106 Data Fig. 3 for details and limitations regarding the heterogeneity of the natively isolated  
107 specimen).

108  
109 Cx46/50 is captured in the stabilized open-state, as previously described<sup>16</sup> (backbone C $\alpha$  r.m.s.d.  
110 = 0.49–0.56 Å and Extended Data Fig. 5), and exposes many new features of the connexin  
111 channels that are detailed below. Intercellular channels are constructed by a dodecameric (12-  
112 mer) assembly, with six subunits assembled into ‘hemi-channels’ that dock together through  
113 extracellular domains, resulting in a continuous ~1.4 nm pore for intercellular permeation (Fig.  
114 1a,c and Supplemental Movie 2). The distance separating the two lipid nanodisc densities is ~3.5  
115 nm (Fig. 1a,c), matching that observed by x-ray diffraction on native gap junctional plaques<sup>12</sup>.

116  
117 Each monomer consists of four transmembrane helices (TM1-4), two extracellular loops (EC1-2)  
118 that form the sites of docking interaction and an amphipathic n-terminal helix (NTH), implicated in  
119 channel selectivity/gating, is well resolved in the stabilized open-state, as previously described<sup>16</sup>  
120 (Fig. 1c,d and Supplemental Movie 3). However, the significant enhancement in resolution  
121 allowed for detailed refinement of sidechain conformations and notable improvement in precision  
122 at functional sites, including the NTH domain and the EC1/2 docking sites (Extended Data Fig.  
123 3,5). Furthermore, the quality of the CryoEM map allowed for modeling previously un-resolved  
124 regions of TM2 and TM3, which effectively extend the cytoplasmic vestibule of the channel by  
125 ~20 Å, as compared to our previous model (Fig. 1c,d), significantly augmenting the electrostatic  
126 environment of the pore entrance (Extended Data Fig. 5). The intracellular loop (ICL) and c-  
127 terminal domain (CTD) remain unresolved, presumably due to intrinsic disorder of these  
128 regulatory domains<sup>16,18,19</sup>.

129  
130 Perhaps the most remarkable features of the CryoEM map, however, are the non-protein  
131 components of the cell-to-cell junction that are now resolved. A bouquet of 15 ordered lipid acyl-  
132 chains is held in place by each of the 12 connexin subunits, which appear to buttress the channel  
133 assembly by filling a cavity formed at the lateral subunit interfaces (Fig. 1a,c,d; *blue*). Surprisingly,



134 acyl-chain densities are observed well beyond the first layer of annular lipids that directly interact  
135 with the TM domains (primarily TM4 and TM3 of a neighboring subunit) (Fig. 1c,d and Extended  
136 Data Fig. 6), suggesting Cx46/50 has a long-range effect on the stability and biophysical  
137 properties of the membrane. Remarkably, all of the resolved lipid densities in the CryoEM map  
138 are specifically localized to the extracellular leaflet of the bilayer, indicating a selective interaction  
139 with the local lipid environment.

140  
141 In addition to stabilized lipids, 396 ordered water molecules are resolved throughout the channel  
142 (33 waters per subunit) (Fig. 1,2; *red* and Extended Data Fig. 6). Waters are found at both solvent  
143 accessible and buried sites within the core of the channel, apparently contributing to the  
144 permeation pathway and structural integrity of the channel assembly (Fig. 1,2). The assignment  
145 of water densities was supported by all-atom equilibrium MD simulations conducted in the  
146 presence of explicit water and 150mM NaCl or KCl (see Methods and Extended Data Fig. 7,8).  
147 There was no clear evidence that the resolved solvent sites correlated with low-affinity ion binding  
148 sites observed by MD (not shown). In the following sections, we describe these newly resolved  
149 features in further detail and discuss their potential structural and functional roles.

150  
151 **Stabilized waters contribute to the permeation pathway and core architecture of Cx46/50**

152 Gap junctions establish aqueous pathways that allow a variety of cytosolic substrates, less than  
153 ~1 kDa in size, to permeate from cell to cell<sup>20</sup>. The permeation pathway is established by the pore-  
154 lining NTH domain, TM1/2 and EC1 domains (Fig. 1c,d). Within the channel pore of Cx46/50,  
155 there are 108 waters bound at solvent-exposed sites (9 per subunit). Pore-bound waters localize  
156 to regions of the EC1 domain and TM1 parahelix, and mediate an extensive network of h-bonding  
157 interactions, involving, D42, F43 ( $\pi$  bonding), E48, Q49, N63 and R76 in Cx50 (positions 42 and  
158 43 are Glu in Cx46), and several protein backbone interactions (Fig. 2a,b and Extended Data Fig.  
159 6).

160  
161 EC1 and the TM1 parahelix contribute to the selectivity, conductance and slow (loop) voltage-  
162 gating mechanisms of Cx46/50<sup>16,21-23</sup> and other connexins<sup>24-29</sup>, and are implicated in Ca<sup>2+</sup>-  
163 regulation in Cx26 by X-ray crystallography<sup>19</sup>, MD studies<sup>27,30</sup>, and by functional mutation studies  
164 of Cx46<sup>30</sup>. As such, these pore-lining waters may functionally contribute to these mechanisms, for  
165 example, by orienting or extending the hydrogen-bonding potential of amino-acid sidechains  
166 involved in the coordination of substrates (or regulatory ions), buffering the electrostatic properties

167 of the channel pore, or integrating the electrostatic network that is proposed to couple EC1/TM1  
168 to the fast (NTH) voltage-gating domain<sup>31,32</sup>.

169  
170 On the extracellular surface of the channel, symmetry-related rings of tightly bound water  
171 molecules are organized at the extracellular aqueous-lipid boundary (Fig.1a,c and Fig. 2a,c). In  
172 the ensemble CryoEM map, the PC lipid head groups are not resolved (due to local disorder  
173 described in the following sections). Nevertheless, these stabilized rings of water are nominally  
174 positioned at the acyl-headgroup boundary of the extracellular lipid leaflet. These waters are  
175 stabilized by hydrogen bonds with EC1/2 residues (D67, R183/Q171 and T207/T195 in  
176 Cx50/Cx46, respectively) and expected to be further coordinated through non-specific  
177 interactions with the phospho-glycerol backbone of the extracellular PC lipids (Fig. 2c; and  
178 discussed below).

179  
180 The EC1/2 domains appear to be the most well-ordered region of the channel, as reflected by  
181 local-resolution of the CryoEM density map (Extended Data Fig. 3) and root-mean-square-  
182 fluctuation (r.m.s.f.) analysis of MD-trajectories (Extended Data Fig. 7) This high-degree of  
183 stability reflects the important functional role of the EC1/2 domains in maintaining an electro-  
184 chemical seal at the cell-to-cell junction. Several clusters of water molecules are found buried a  
185 sites located both within and between the EC1/2 domains of individual subunits (Fig. 2a, d-f). A  
186 cluster of four waters are buried within the EC1/2 domains is coordinated by residues D47, E48,  
187 Y66, F70 ( $\pi$  bonding), S73, S204/S192 and K209/K197, in Cx50/46 respectively (Fig. 2d). Four  
188 additional waters are buried at the lateral EC domain interface formed by neighboring subunits,  
189 primarily coordinated by hydrogen bonding interactions with the peptide backbone and sidechains  
190 of Q49, D67 and E208/E196, in Cx50/Cx46 respectively (Fig. 2e). The degree of coordination of  
191 these buried waters suggest they contribute to the architectural integrity of EC1/2 docking  
192 domains, and may in part explain why deleterious mutations at D47, E48 and D67 in Cx50 linked  
193 to cataract formation disrupt junctional coupling and/or biogenesis<sup>33-35</sup>.

194  
195 The EC1/EC2 domains also play important roles in establishing the specificity of hemi-channel  
196 docking interactions formed between different connexin isoforms, and the ability to establish so-  
197 called homotypic or heterotypic channels<sup>36-38</sup>. Elucidating the determinants of hemi-channel  
198 recognition is therefore critical to understanding the principles dictating cell-type specificity of gap  
199 junctional coupling<sup>39</sup>. It has been proposed that isoform-specific hydrogen bonding patterns that  
200 bridge the EC1/EC2 interface govern hemi-channel docking compatibility<sup>38,40</sup>. Contributing to this

201 bridging site in Cx46/50 is a cluster of 12 water molecules (per subunit pair) that are deeply  
202 integrated within a dense network of hydrogen bonds between EC1/EC2 residues of opposed  
203 subunits (Fig. 2f). At the center of this network is the highly conserved K/R-N-D motif found in  
204 EC2 of Group I compatible connexins (including Cx50, Cx46, Cx32 and Cx26). Genetic mutations  
205 of this motif in Cx46/50 are linked to congenital cataracts<sup>16,41</sup>, as well as other genetic disorders  
206 (e.g., Charcot-Marie-Tooth disease<sup>42</sup> and non-syndromic deafness<sup>43</sup>), when mutated in other  
207 Group I connexins. These observations suggest interfacial waters may play previously  
208 unappreciated and functionally important roles in establishing the structural integrity of the  
209 intercellular channel and contribute to the specificity of hemi-channel docking interactions  
210 involved in regulating the formation of intercellular communication pathways.

211

### 212 **Cx46/50 induces long-range ordering at the extracellular lipid leaflet**

213 The degree of long-range stabilization to the local lipid environment observed in the Cx46/50  
214 nanodisc reconstruction, extending several solvent layers away from the protein, is (to our  
215 knowledge) unprecedented. DMPC was selected as a model lipid because of the high PC content  
216 of mammalian (sheep) lens<sup>44</sup>, and reconstitution studies show DMPC produces Cx46/50  
217 assemblies that are indistinguishable from those formed with native lipids<sup>14,45</sup>. Due to its complete  
218 saturation DMPC has a relatively high phase-transition (*i.e.*, melting) temperature ( $T_m$ ) compared  
219 to other biological lipids ( $T_m \sim 24^\circ \text{C}$  in pure lipid vesicles<sup>46</sup>). This value is close to the temperature  
220 at which reconstitution was performed ( $\sim 25^\circ \text{C}$ , room temperature). However, in nanodiscs the  
221 melting temperature of DMPC is reportedly higher ( $\sim 28^\circ \text{C}$ ), due to compartmentalization effects  
222 by the MSP scaffold<sup>47</sup>. Nevertheless, the specific localization of stabilized lipids to the extracellular  
223 leaflets observed by CryoEM (and also by MD studies, described below) suggested long-range  
224 lipid stabilization is induced through interactions with Cx46/50 (Fig 1, 3a).

225

226 To gain further insight into the lipid-stabilization observed by CryoEM, we analyzed time-averaged  
227 densities of DMPC acyl-chain positions obtained by unbiased all-atom MD simulations for both  
228 Cx50 and Cx46, conducted at  $37^\circ \text{C}$ , where the starting positions of DMPC molecules had been  
229 randomly placed into a 15.4 x 15.4 nm lipid bilayer (see Methods and Extended Data Fig. 7a).  
230 Following equilibration, the resulting acyl-lipid density profiles displayed remarkable similarity to  
231 what was resolved by CryoEM (Fig. 3a). In both cases, lipids within the extracellular leaflets are  
232 specifically stabilized, as compared to the intracellular lipid leaflet (Fig. 3a). Furthermore, the  
233 resolved clusters of acyl-chain densities obtained by MD display the same hexagonal packing  
234 pattern that extends 3-4 orders beyond the annular shell, as observed by CryoEM (Fig. 3a, *inset*).

235  
236 The corroborating results obtained by MD imply that the lipid stabilization observed by CryoEM is  
237 specifically induced by structural features of the Cx46/50 TM domains, and not an artifact of the  
238 nanodisc. Each cluster of lipids is bound by a shallow pocket of hydrophobic and aromatic  
239 residues, displayed by TM2/3 and TM4 of adjacent subunits (Fig. 3a,b). A cleft, rich in aromatic  
240 sidechains (formed by F32, F84, L167/L155 and F168/F156 in Cx50/C46, respectively)  
241 intercalates into the bilayer, appearing to bisect the extracellular leaflet from the more disordered  
242 intracellular leaflet (Fig. 3b). In this way, it appears that the acyl-lipid binding pocket selectively  
243 grasps a large bouquet of lipids from the extracellular leaflet, inducing long-range stabilization to  
244 the membrane through extensive Van der Waals interaction.

245  
246 The extended acyl-lipid chain conformation and hexagonal packing adopted by the bouquet of  
247 bound lipids are indicative of a quasi phase-transition to the liquid-ordered (or gel-like) state. To  
248 obtain a more quantitative assessment of the degree of lipid stabilization, we extracted SN1 and  
249 SN2 lipid order parameters ( $S_{CD}$ ) from the MD-simulations, which have been parameterized to fit  
250 well to experimental NMR-based order parameters<sup>48</sup>. These results are consistent with the notion  
251 that Cx46/50 induces a phase transition from a fluid to a gel-like state that is specific to the  
252 extracellular lipid leaflet, as indicated by a shift in order parameters to above  $\sim 0.25$ <sup>49</sup> (acyl-chain  
253 carbons 4–11; Fig. 3c and Extended Data Fig. 9), which extend  $\sim 10$ – $20$  Å from the protein  
254 surface, as observed by CryoEM.

255  
256 Although this degree of stabilization to the local lipid environment is likely to depend on lipid type,  
257 the general effects may be functionally important. For example, by contributing to the architectural  
258 integrity at the gap junctional interface, partitioning specific types of lipids, or even templating  
259 long-range hexagonal packing interactions found in plaque assemblies<sup>45,50</sup>. In this context, it is  
260 noteworthy that connexins localize to lipid raft domains<sup>51,52</sup>, which are rich in high  $T_m$  lipids (e.g.,  
261 sphingomyelin) and characterized as forming a liquid-ordered state.

262  
263 **Annular PC lipids adopt a dynamic ensemble of conformational and configurational states**

264 Another notable feature of the lipid densities observed in the CryoEM map is that PC head groups  
265 are not observed, despite sufficient resolution to expect such features (Fig. 1, 3a). Super-  
266 positioning of representative lipid conformations obtained by MD show that, although the annular  
267 lipid acyl-chains were relatively well ordered and superimpose, their corresponding head groups  
268 remain conformationally dynamic and/or heterogeneously positioned (Fig. 3d and Supplemental

269 Movie 4). Such behavior would rationalize the lack of resolvability in the averaged CryoEM density  
270 map. In an attempt to resolve this heterogeneity, we conducted 3D-classification analysis on the  
271 ensemble CryoEM data (Methods and Extended Data Fig. 4), which resulted in three distinct 3D  
272 reconstructions resolved at resolutions of  $\sim 2.5$  Å (gold-standard FSC) (Fig. 4a-c and Extended  
273 Data Fig. 4).

274  
275 In each of the 3D classes, PC head groups and/or phospho-glycerol backbone of individual  
276 annular lipids were uniquely resolved (PC Class 1–3, Fig. 4a). The conformational state of  
277 Cx46/50 is very similar in all three classes, and essentially indistinguishable from models derived  
278 from the ensemble density map ( $C\alpha$  r.m.s.d.'s = 0.24 – 0.34 Å). Notably, structural features of  
279 each of these fully-resolved lipids are shared amongst these classes. For example, the SN2 acyl-  
280 chain of PC Class 1 overlays with the SN1 chain of PC Class 3 (Fig. 4a,c; *yellow and blue*).  
281 Likewise, the SN1 chain of PC Class 2 also overlays with the SN1 chain of PC Class 3 (Fig. 4a,c;  
282 *orange and blue*). This suggested that multiple, overlapping, configurational states are capable of  
283 supporting the same lattice of acyl-chain positions observed in the CryoEM reconstructions,  
284 consistent with non-specific and/or transient binding interactions.

285  
286 The choline head group of PC Class 1 remained unresolved, however the negatively charged  
287 phospho-glycerol backbone is clearly visualized and appears to be stabilized by flanking positively  
288 charged arginine residues R183 and R192 in Cx50 (Q171 and R180 in Cx46) (Fig. 4b; *left*), and  
289 hydrogen bonding with two water molecules (part of the belt of extracellular waters described  
290 above, see Fig. 2c). PC Class 2 and 3 resolve distinct acyl-chain configurations, yet, both of these  
291 states share a similar placement of their positively charged choline head groups. Head group  
292 placement of these lipids is supported by non-specific hydrogen-bond interactions with backbone  
293 carbonyls presented by EC1 and TM3 (involving residues E68, A69 and L179 in Cx50; position  
294 68 is an Arg in Cx46) and a buried water molecule (Fig. 4b; *center and right*). The phospho-  
295 glycerol backbones of PC Class 2/3 lipids are coordinated by hydrogen-bonding to local waters  
296 and the backbone amide of L179 in Cx50 (L167 in Cx46). Remarkably, the SN2 acyl chain and  
297 glycerol backbone of the PC Class 2 lipid is completely resolved, despite lacking any direct contact  
298 with the Cx46/50 protein interface (Fig. 4a,c).

299  
300 Collectively, these observations support the notion that while the Cx46/50 acyl-chain interactions  
301 appear to be high-affinity, the lipid head group interactions are nonspecific and adopt a variety of  
302 configurational/conformational states. This is reinforced by our MD-simulation studies for both

303 Cx50 and Cx46, where mapping of PC arrangements at resolved acyl-chain densities show a  
304 variety of configurational states that co-exist within the dodecameric assembly. Furthermore,  
305 during the timescale of the simulations (100 ns), time-resolved PC configurations could be  
306 classified as being either stable or dynamically transitioning between multiple configurational  
307 states (Fig. 4d and Supplemental Movie 5,6). Notably, the most stable (yet overlapping)  
308 configurations (*e.g.*, 1-2 and 1-5 configurations) are the same as those resolved by CryoEM 3D  
309 classification (Fig. 4a,c,d; *blue and yellow respectively*). Yet, other lipid trajectories were observed  
310 interconverting between these same configurations over this relatively short time-scale (Fig. 4d).  
311 The degree of configurational preference diminishes beyond the first two solvent shells,  
312 presumably due to the loss of energetic influence induced by protein interactions (Fig. 4d), and  
313 reflect the randomized head group arrangements expected of a bulk lipid population. Taken  
314 together, these data show Cx46/50 stabilizes the dynamic local lipid environment through non-  
315 specific interactions with the extracellular leaflet, with multiple configurational PC lipid states  
316 existing at the annular interface and effectively captured by CryoEM.

317

### 318 **Concluding Remarks**

319 The structure and function of membrane proteins are deeply integrated with their lipid  
320 environment. Our mechanistic understanding of protein-lipid interactions have been largely  
321 shaped by high-resolution structures of membrane proteins where specifically bound lipids have  
322 been captured at well-defined binding sites<sup>53</sup>. Yet, most interactions made between membrane  
323 proteins and their local membrane environment are relatively non-specific and highly dynamic.  
324 The mechanistic principles and biophysical consequences underlying such interactions remains  
325 poorly understood, as these interactions are typically lost during protein purification, or remain too  
326 dynamic to resolve by traditional structural methods. By exploiting the potential of lipid nanodisc  
327 technologies coupled with single particle CryoEM and MD simulation, we show that Cx46/50  
328 intercellular communication channels form dynamic interactions with annular lipids. These non-  
329 specific interactions have long-range stabilizing effects capable of inducing a phase separation to  
330 high  $T_m$  lipids, which may extend  $\sim 20$  Å from the protein surface. These interactions appear  
331 selective toward the extracellular leaflet of pure PC membranes, which may have significant  
332 consequences on the biomechanical properties and lipid composition of gap junctional domains.  
333 In fact, the lack of resolved lipids in the intracellular leaflet may reflect the selectivity at this leaflet  
334 toward non-PC lipid types, as suggested for Cx26/32<sup>15</sup>. The methods developed here provide a  
335 valuable high-resolution platform for developing our deeper understanding of the specificity and  
336 physiological role lipids play in gap junction biology, and how aberrant lipid environments may

337 contribute to connexin-related pathologies. Indeed, the capability of resolving connexin channels  
338 beyond the critical threshold of ~2.0–2.5 Å resolution, the precision desired for structure-based  
339 drug design – *e.g.*, providing detailed stereo-chemical models and placement of architectural  
340 water molecules – now opens the door to rational development of selective high-affinity  
341 pharmacological tools that are desperately needed in this field to better understand and potentially  
342 treat a wide range of connexin-opathies<sup>54</sup>.  
343  
344



345 **Main Text References**

- 346 1 Goodenough, D. A. & Paul, D. L. Gap junctions. *Cold Spring Harbor perspectives in*  
347 *biology* **1**, a002576, doi:10.1101/cshperspect.a002576 (2009).
- 348 2 Malewicz, B., Kumar, V. V., Johnson, R. G. & Baumann, W. J. Lipids in gap junction  
349 assembly and function. *Lipids* **25**, 419-427, doi:10.1007/bf02538083 (1990).
- 350 3 Cascio, M. Connexins and their environment: effects of lipids composition on ion channels.  
351 *Biochim Biophys Acta* **1711**, 142-153, doi:10.1016/j.bbamem.2004.12.001 (2005).
- 352 4 Puebla, C., Retamal, M. A., Acuna, R. & Saez, J. C. Regulation of Connexin-Based  
353 Channels by Fatty Acids. *Front Physiol* **8**, 11, doi:10.3389/fphys.2017.00011 (2017).
- 354 5 Sosinsky, G. E. & Nicholson, B. J. Structural organization of gap junction channels.  
355 *Biochim Biophys Acta* **1711**, 99-125, doi:10.1016/j.bbamem.2005.04.001 (2005).
- 356 6 Sohl, G. & Willecke, K. Gap junctions and the connexin protein family. *Cardiovasc Res* **62**,  
357 228-232, doi:10.1016/j.cardiores.2003.11.013 (2004).
- 358 7 Harris, A. L. Connexin channel permeability to cytoplasmic molecules. *Prog Biophys Mol*  
359 *Biol* **94**, 120-143, doi:10.1016/j.pbiomolbio.2007.03.011 (2007).
- 360 8 Bonacquisti, E. E. & Nguyen, J. Connexin 43 (Cx43) in cancer: Implications for therapeutic  
361 approaches via gap junctions. *Cancer Lett* **442**, 439-444,  
362 doi:10.1016/j.canlet.2018.10.043 (2019).
- 363 9 Delmar, M. *et al.* Connexins and Disease. *Cold Spring Harbor perspectives in biology*,  
364 doi:10.1101/cshperspect.a029348 (2017).
- 365 10 Garcia, I. E. *et al.* Connexinopathies: a structural and functional glimpse. *BMC Cell Biol*  
366 **17 Suppl 1**, 17, doi:10.1186/s12860-016-0092-x (2016).
- 367 11 Aasen, T., Mesnil, M., Naus, C. C., Lampe, P. D. & Laird, D. W. Gap junctions and cancer:  
368 communicating for 50 years. *Nat Rev Cancer* **16**, 775-788, doi:10.1038/nrc.2016.105  
369 (2016).
- 370 12 Makowski, L., Caspar, D. L., Phillips, W. C. & Goodenough, D. A. Gap junction structures.  
371 II. Analysis of the x-ray diffraction data. *J Cell Biol* **74**, 629-645 (1977).
- 372 13 Revel, J. P. & Karnovsky, M. J. Hexagonal array of subunits in intercellular junctions of  
373 the mouse heart and liver. *J Cell Biol* **33**, C7-C12, doi:10.1083/jcb.33.3.c7 (1967).
- 374 14 Kistler, J., Goldie, K., Donaldson, P. & Engel, A. Reconstitution of native-type  
375 noncrystalline lens fiber gap junctions from isolated hemichannels. *J Cell Biol* **126**, 1047-  
376 1058, doi:10.1083/jcb.126.4.1047 (1994).
- 377 15 Locke, D. & Harris, A. L. Connexin channels and phospholipids: association and  
378 modulation. *BMC Biol* **7**, 52, doi:10.1186/1741-7007-7-52 (2009).
- 379 16 Myers, J. B. *et al.* Structure of native lens connexin 46/50 intercellular channels by cryo-  
380 EM. *Nature* **564**, 372-377, doi:10.1038/s41586-018-0786-7 (2018).
- 381 17 Denisov, I. G., Grinkova, Y. V., Lazarides, A. A. & Sligar, S. G. Directed self-assembly of  
382 monodisperse phospholipid bilayer Nanodiscs with controlled size. *J Am Chem Soc* **126**,  
383 3477-3487, doi:10.1021/ja0393574 (2004).
- 384 18 Maeda, S. *et al.* Structure of the connexin 26 gap junction channel at 3.5 Å resolution.  
385 *Nature* **458**, 597-602, doi:10.1038/nature07869 (2009).

- 386 19 Bennett, B. C. *et al.* An electrostatic mechanism for Ca(2+)-mediated regulation of gap  
387 junction channels. *Nat Commun* **7**, 8770, doi:10.1038/ncomms9770 (2016).
- 388 20 Gong, X. Q. & Nicholson, B. J. Size selectivity between gap junction channels composed  
389 of different connexins. *Cell Commun Adhes* **8**, 187-192 (2001).
- 390 21 Trexler, E. B., Bukauskas, F. F., Kronengold, J., Bargiello, T. A. & Verselis, V. K. The first  
391 extracellular loop domain is a major determinant of charge selectivity in connexin46  
392 channels. *Biophys J* **79**, 3036-3051, doi:10.1016/S0006-3495(00)76539-8 (2000).
- 393 22 Kronengold, J., Trexler, E. B., Bukauskas, F. F., Bargiello, T. A. & Verselis, V. K. Pore-  
394 lining residues identified by single channel SCAM studies in Cx46 hemichannels. *Cell*  
395 *Commun Adhes* **10**, 193-199 (2003).
- 396 23 Verselis, V. K., Trelles, M. P., Rubinos, C., Bargiello, T. A. & Srinivas, M. Loop gating of  
397 connexin hemichannels involves movement of pore-lining residues in the first extracellular  
398 loop domain. *The Journal of biological chemistry* **284**, 4484-4493,  
399 doi:10.1074/jbc.M807430200 (2009).
- 400 24 Oh, S., Verselis, V. K. & Bargiello, T. A. Charges dispersed over the permeation pathway  
401 determine the charge selectivity and conductance of a Cx32 chimeric hemichannel. *J*  
402 *Physiol* **586**, 2445-2461, doi:10.1113/jphysiol.2008.150805 (2008).
- 403 25 Kwon, T. *et al.* Molecular dynamics simulations of the Cx26 hemichannel: insights into  
404 voltage-dependent loop-gating. *Biophys J* **102**, 1341-1351, doi:10.1016/j.bpj.2012.02.009  
405 (2012).
- 406 26 Kwon, T., Harris, A. L., Rossi, A. & Bargiello, T. A. Molecular dynamics simulations of the  
407 Cx26 hemichannel: evaluation of structural models with Brownian dynamics. *J Gen*  
408 *Physiol* **138**, 475-493, doi:10.1085/jgp.201110679 (2011).
- 409 27 Zonta, F., Polles, G., Zanotti, G. & Mammano, F. Permeation pathway of homomeric  
410 connexin 26 and connexin 30 channels investigated by molecular dynamics. *J Biomol*  
411 *Struct Dyn* **29**, 985-998, doi:10.1080/073911012010525027 (2012).
- 412 28 Bargiello, T. A., Tang, Q., Oh, S. & Kwon, T. Voltage-dependent conformational changes  
413 in connexin channels. *Biochim Biophys Acta* **1818**, 1807-1822,  
414 doi:10.1016/j.bbamem.2011.09.019 (2012).
- 415 29 Tong, X. *et al.* The First Extracellular Domain Plays an Important Role in Unitary Channel  
416 Conductance of Cx50 Gap Junction Channels. *PLoS One* **10**, e0143876,  
417 doi:10.1371/journal.pone.0143876 (2015).
- 418 30 Lopez, W. *et al.* Mechanism of gating by calcium in connexin hemichannels. *Proc Natl*  
419 *Acad Sci U S A* **113**, E7986-E7995, doi:10.1073/pnas.1609378113 (2016).
- 420 31 Garcia, I. E. *et al.* The syndromic deafness mutation G12R impairs fast and slow gating in  
421 Cx26 hemichannels. *J Gen Physiol* **150**, 697-711, doi:10.1085/jgp.201711782 (2018).
- 422 32 Rubinos, C., Sanchez, H. A., Verselis, V. K. & Srinivas, M. Mechanism of inhibition of  
423 connexin channels by the quinine derivative N-benzylquininium. *J Gen Physiol* **139**, 69-  
424 82, doi:10.1085/jgp.201110678 (2012).
- 425 33 Banks, E. A. *et al.* Connexin mutation that causes dominant congenital cataracts inhibits  
426 gap junctions, but not hemichannels, in a dominant negative manner. *J Cell Sci* **122**, 378-  
427 388, doi:10.1242/jcs.034124 (2009).

- 428 34 Berthoud, V. M. *et al.* Connexin50D47A decreases levels of fiber cell connexins and  
429 impairs lens fiber cell differentiation. *Invest Ophthalmol Vis Sci* **54**, 7614-7622,  
430 doi:10.1167/iovs.13-13188 (2013).
- 431 35 Reis, L. M. *et al.* Whole exome sequencing in dominant cataract identifies a new causative  
432 factor, CRYBA2, and a variety of novel alleles in known genes. *Hum Genet* **132**, 761-770,  
433 doi:10.1007/s00439-013-1289-0 (2013).
- 434 36 White, T. W., Bruzzone, R., Wolfram, S., Paul, D. L. & Goodenough, D. A. Selective  
435 interactions among the multiple connexin proteins expressed in the vertebrate lens: the  
436 second extracellular domain is a determinant of compatibility between connexins. *J Cell*  
437 *Biol* **125**, 879-892 (1994).
- 438 37 White, T. W., Paul, D. L., Goodenough, D. A. & Bruzzone, R. Functional analysis of  
439 selective interactions among rodent connexins. *Mol Biol Cell* **6**, 459-470,  
440 doi:10.1091/mbc.6.4.459 (1995).
- 441 38 Nakagawa, S. *et al.* Asparagine 175 of connexin32 is a critical residue for docking and  
442 forming functional heterotypic gap junction channels with connexin26. *The Journal of*  
443 *biological chemistry* **286**, 19672-19681, doi:10.1074/jbc.M110.204958 (2011).
- 444 39 Cottrell, G. T. & Burt, J. M. Functional consequences of heterogeneous gap junction  
445 channel formation and its influence in health and disease. *Biochim Biophys Acta* **1711**,  
446 126-141, doi:10.1016/j.bbamem.2004.11.013 (2005).
- 447 40 Bai, D. & Wang, A. H. Extracellular domains play different roles in gap junction formation  
448 and docking compatibility. *Biochem J* **458**, 1-10, doi:10.1042/BJ20131162 (2014).
- 449 41 Schadzek, P. *et al.* The cataract related mutation N188T in human connexin46 (hCx46)  
450 revealed a critical role for residue N188 in the docking process of gap junction channels.  
451 *Biochim Biophys Acta* **1858**, 57-66, doi:10.1016/j.bbamem.2015.10.001 (2016).
- 452 42 Silander, K. *et al.* Spectrum of mutations in Finnish patients with Charcot-Marie-Tooth  
453 disease and related neuropathies. *Hum Mutat* **12**, 59-68, doi:10.1002/(SICI)1098-  
454 1004(1998)12:1<59::AID-HUMU9>3.0.CO;2-A (1998).
- 455 43 Primignani, P. *et al.* A novel dominant missense mutation--D179N--in the GJB2 gene  
456 (Connexin 26) associated with non-syndromic hearing loss. *Clin Genet* **63**, 516-521,  
457 doi:10.1034/j.1399-0004.2003.00079.x (2003).
- 458 44 Deeley, J. M. *et al.* Human lens lipids differ markedly from those of commonly used  
459 experimental animals. *Biochim Biophys Acta* **1781**, 288-298,  
460 doi:10.1016/j.bbalip.2008.04.002 (2008).
- 461 45 Lampe, P. D. *et al.* In vitro assembly of gap junctions. *J Struct Biol* **107**, 281-290 (1991).
- 462 46 Mabrey, S. & Sturtevant, J. M. Investigation of phase transitions of lipids and lipid mixtures  
463 by sensitivity differential scanning calorimetry. *Proc Natl Acad Sci U S A* **73**, 3862-3866,  
464 doi:10.1073/pnas.73.11.3862 (1976).
- 465 47 Shaw, A. W., McLean, M. A. & Sligar, S. G. Phospholipid phase transitions in  
466 homogeneous nanometer scale bilayer discs. *FEBS Lett* **556**, 260-264,  
467 doi:10.1016/s0014-5793(03)01400-5 (2004).
- 468 48 Vermeer, L. S., de Groot, B. L., Reat, V., Milon, A. & Czaplicki, J. Acyl chain order  
469 parameter profiles in phospholipid bilayers: computation from molecular dynamics  
470 simulations and comparison with 2H NMR experiments. *Eur Biophys J* **36**, 919-931,  
471 doi:10.1007/s00249-007-0192-9 (2007).

- 472 49 Khakbaz, P. & Klauda, J. B. Investigation of phase transitions of saturated phosphocholine  
473 lipid bilayers via molecular dynamics simulations. *Biochim Biophys Acta Biomembr* **1860**,  
474 1489-1501, doi:10.1016/j.bbamem.2018.04.014 (2018).
- 475 50 Caspar, D. L., Goodenough, D. A., Makowski, L. & Phillips, W. C. Gap junction structures.  
476 I. Correlated electron microscopy and x-ray diffraction. *J Cell Biol* **74**, 605-628 (1977).
- 477 51 Schubert, A. L., Schubert, W., Spray, D. C. & Lisanti, M. P. Connexin family members  
478 target to lipid raft domains and interact with caveolin-1. *Biochemistry* **41**, 5754-5764,  
479 doi:10.1021/bi0121656 (2002).
- 480 52 Locke, D., Liu, J. & Harris, A. L. Lipid rafts prepared by different methods contain different  
481 connexin channels, but gap junctions are not lipid rafts. *Biochemistry* **44**, 13027-13042,  
482 doi:10.1021/bi050495a (2005).
- 483 53 Hunte, C. Specific protein-lipid interactions in membrane proteins. *Biochem Soc Trans* **33**,  
484 938-942 (2005).
- 485 54 Spray, D. C., Rozental, R. & Srinivas, M. Prospects for rational development of  
486 pharmacological gap junction channel blockers. *Current drug targets* **3**, 455-464 (2002).  
487  
488

489 **Acknowledgements**

490 We thank Dror Chorev and Carol V. Robinson for help analyzing specimens prepared for CryoEM.

491 We are grateful to the staff at the OHSU Multiscale Microscopy Core and Advanced Computing

492 center, and to the Pacific Northwest Center for CryoEM (supported by NIH Grant U24GM129547)

493 and accessed through EMSL (grid.436923.9). J.A.F. is supported by the National Institutes of

494 Health NRSA (F31-EY030409). K.A.D. is supported by National Institutes of Health BUILD EXITO

495 Program (TL4-GM118965) and Berkeley Molecular Biophysics Training Grant (T32-GM008295).

496 C.C.Y. is supported by OHSU. J.C. and D.M.Z. are supported by the OHSU Center for Spatial

497 Systems Biomedicine, by the National Science Foundation (MCB 1715823) and by the National

498 Institutes of Health (R01-GM115805). S.L.R. is supported by the National Institutes of Health

499 (R35-GM124779).

500

501

502 **Author Contributions**

503 J.A.F, B.G.H and K.A.D. contributed equally. K.A.D. and J.A.F. conducted the protein  
504 purification and reconstitution of CryoEM specimens. J.A.F. collected the CryoEM  
505 datasets, performed image analysis and atomic modeling. K.A.D., J.B.M., C.C.Y.  
506 contributed to image analysis. B.G.H. conducted and analyzed the MD simulations.  
507 B.G.H., J.C. and D.M.Z. contributed to the experimental design and analysis of MD  
508 simulations. All authors contributed to manuscript preparation. S.L.R. provided overall  
509 guidance to the design and execution of the work.

510

511 **Author Information**

512 These authors contributed equally: Jonathan A. Flores, Bassam G. Haddad and Kimberly A.  
513 Dolan.

514

515 **Affiliations**

516 *Department of Chemistry, Portland State University, Portland OR 97201, U.S.A.*

517 Jonathan A. Flores, Bassam G. Haddad, Kimberly A. Dolan, Janette B. Myers and Steve L.  
518 Reichow

519

520 *Department of Chemical Physiology and Biochemistry, Oregon Health and Science University,*  
521 *Portland OR 97239, U.S.A.*

522 Jonathan A. Flores and Steve L. Reichow

523

524 *Biophysics Graduate Group, University of California, Berkeley, CA 94720, U.S.A.*

525 Kimberly A. Dolan (current address)

526

527 *Department of Biomedical Engineering, Oregon Health and Science University, Portland OR*  
528 *97239, U.S.A.*

529 Craig C. Yoshioka, Jeremy Cooperman and Daniel M. Zuckerman

530

531 **Competing Interest**

532 The authors declare no competing interests.

533

534 **Corresponding Author**

535 Correspondence and requests for materials should be addressed to [reichow@pdx.edu](mailto:reichow@pdx.edu)



536 **Main Figures**

537

538 **Figure 1**

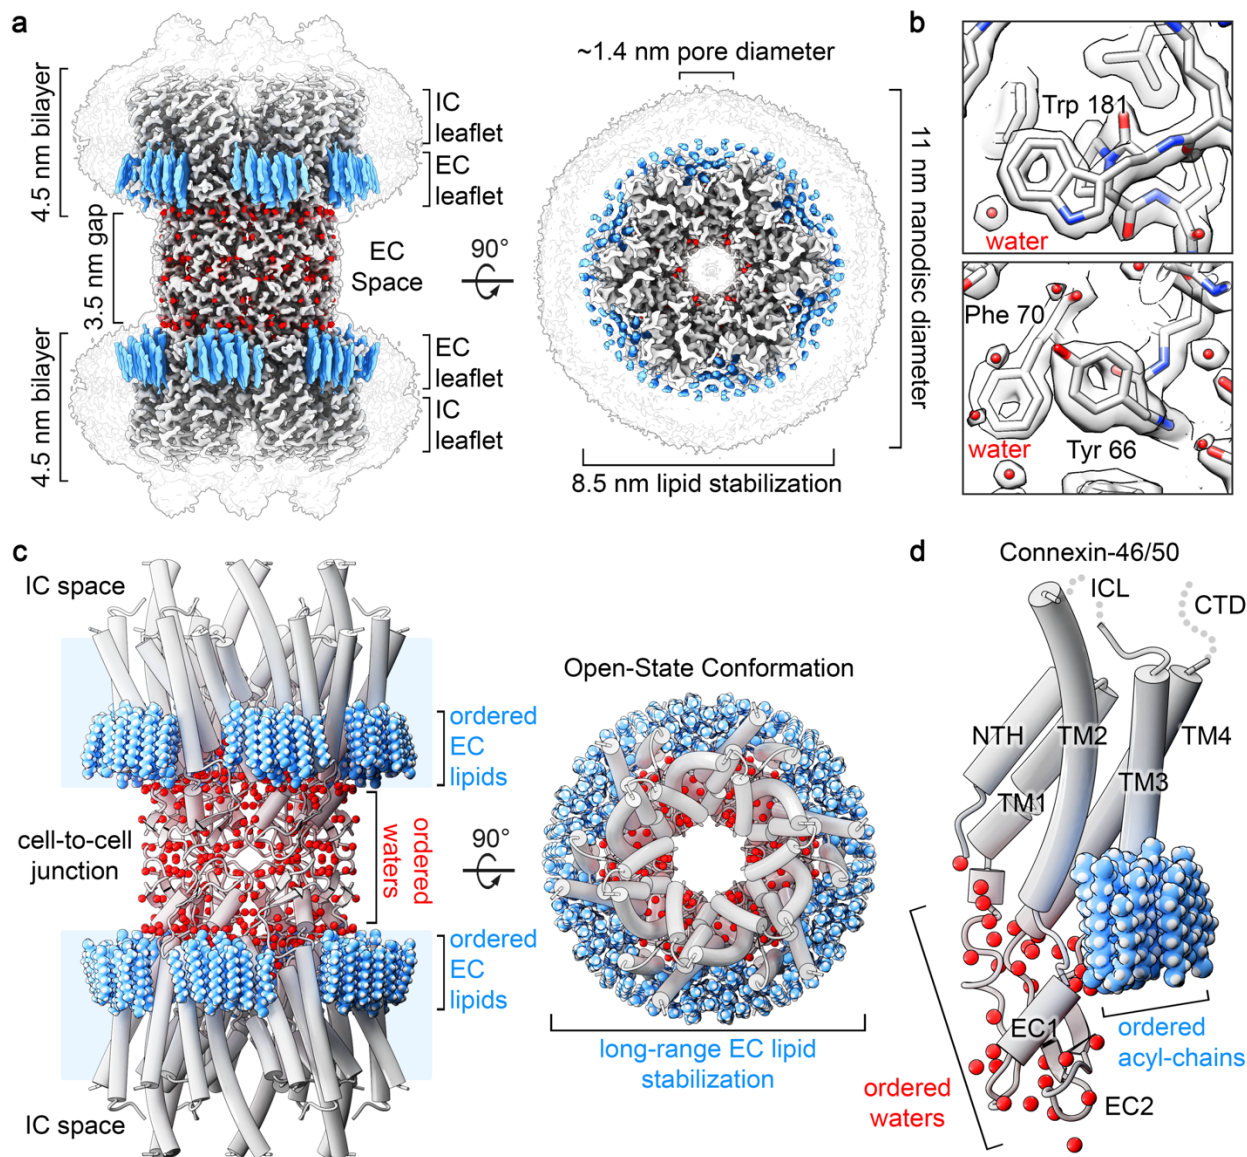

539

540 **Figure 1. Structure of Connexin-46/50 in lipid nanodiscs by CryoEM.** a) CryoEM 3D  
541 reconstruction of Cx46/50 (white) in an open state conformation, with resolved lipid acyl-chains  
542 (blue) and water molecules (red). Transparent silhouette displays the map at low-contour to  
543 illustrate the dimensions of the lipid nanodisc densities, with intracellular (IC) and extracellular  
544 (EC) lipid leaflets indicated. b) Zoom views of the CryoEM map and fitted atomic models, showing  
545 high-resolution features observed at 1.9 Å resolution. c) Model of Cx46/50 (cylinder  
546 representation) with extracellular (EC) lipids and ordered water molecules displayed (spheres).



547 **d)** Cx46/50 monomer, and 15 bound lipids and 33 waters associated with each subunit. Domains  
548 labeled for transmembrane helices (TM1-4), extracellular loops (EC1-2) and n-terminal helix  
549 (NTH). The intracellular loop (ICL) and c-terminal domain (CTD) are not resolved, indicated by  
550 dotted lines.  
551

552 **Figure 2**

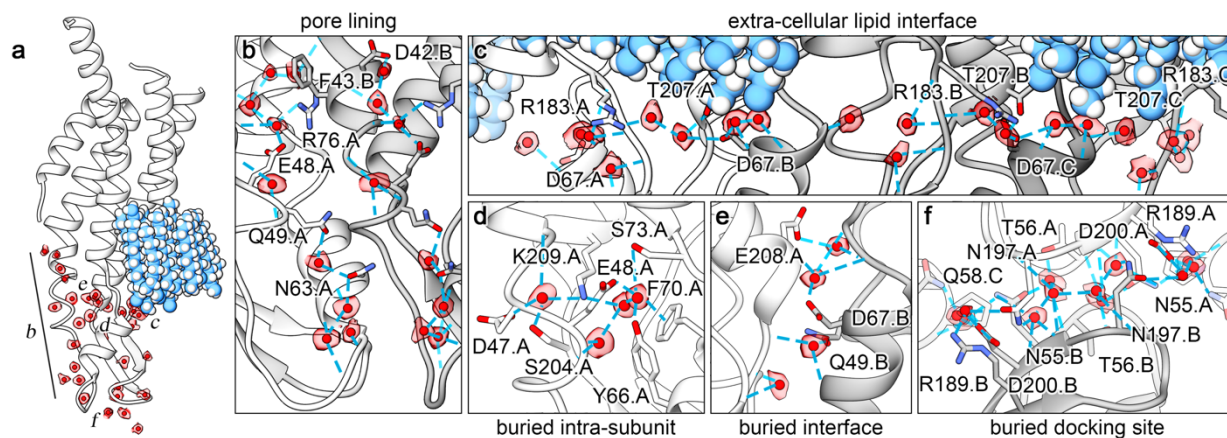

553  
554 **Figure 2. Ordered water molecules resolved in Cx46/50 by CryoEM. a)** Cx46/50 subunit with  
555 segmented CryoEM density of waters overlaid in transparency (colored as in Fig. 1). Labels in  
556 panel a indicate position of the various zoom views, presented in panels **b–f**, showing water  
557 molecules bound to **b)** pore-lining sites, **c)** extra-cellular lipid interface, **d)** buried intra-subunit  
558 sites, **e)** buried subunit interface sites, and **f)** buried cell-to-cell docking sites. In panels b-f, amino  
559 acids sidechains forming hydrogen bonds to water are displayed (blue dotted lines) and labeled  
560 using Cx50 numbering.

561

562

563 **Figure 3**

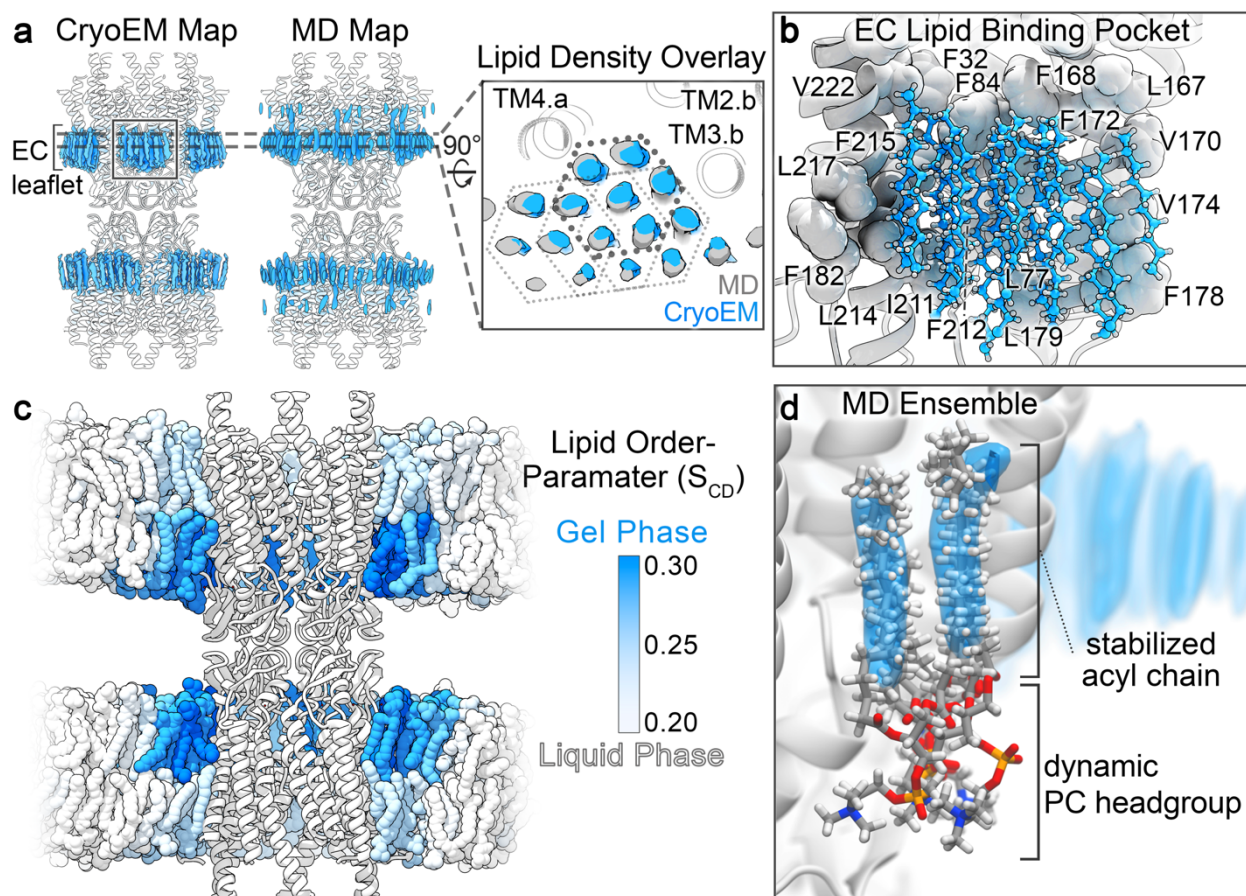

564  
565 **Figure 3. Cx46/50 induces a local phase-separation to the extra-cellular lipid leaflet. a)**  
566 Comparison of acyl-lipid density maps (blue) obtained by CryoEM and time-averaged all-atom  
567 MD-simulation, overlaid onto the Cx46/50 ribbon structure (white). *Inset*, shows a slice-view  
568 (rotated 90°) of overlaid acyl-lipid densities by CryoEM (blue) and MD-simulation (grey). The  
569 hexagonal packing pattern of acyl-chains is indicated (solid and dotted lines), and TM helices  
570 interacting with lipid are labeled. Different subunits are indicated by suffix (*a* or *b*). **b)** Zoom-view  
571 of the acyl-lipid binding pocket, with lipid-binding residues displayed (spheres) and labeled (Cx50  
572 numbering). **c)** MD-snapshot of Cx50 in phosphatidylcholine (PC) lipid bilayers, with time-  
573 averaged lipid order parameter ( $S_{CD}$ ) for each lipid indicated by shading (blue = 0.30 to white =  
574 0.20). **d)** Zoom view, showing an ensemble super-positioning of symmetry-related lipids obtained  
575 by MD-simulation (displayed as all atom representation) occupying the MD-based lipid acyl-chain  
576 density map (blue).

577

578 **Figure 4**

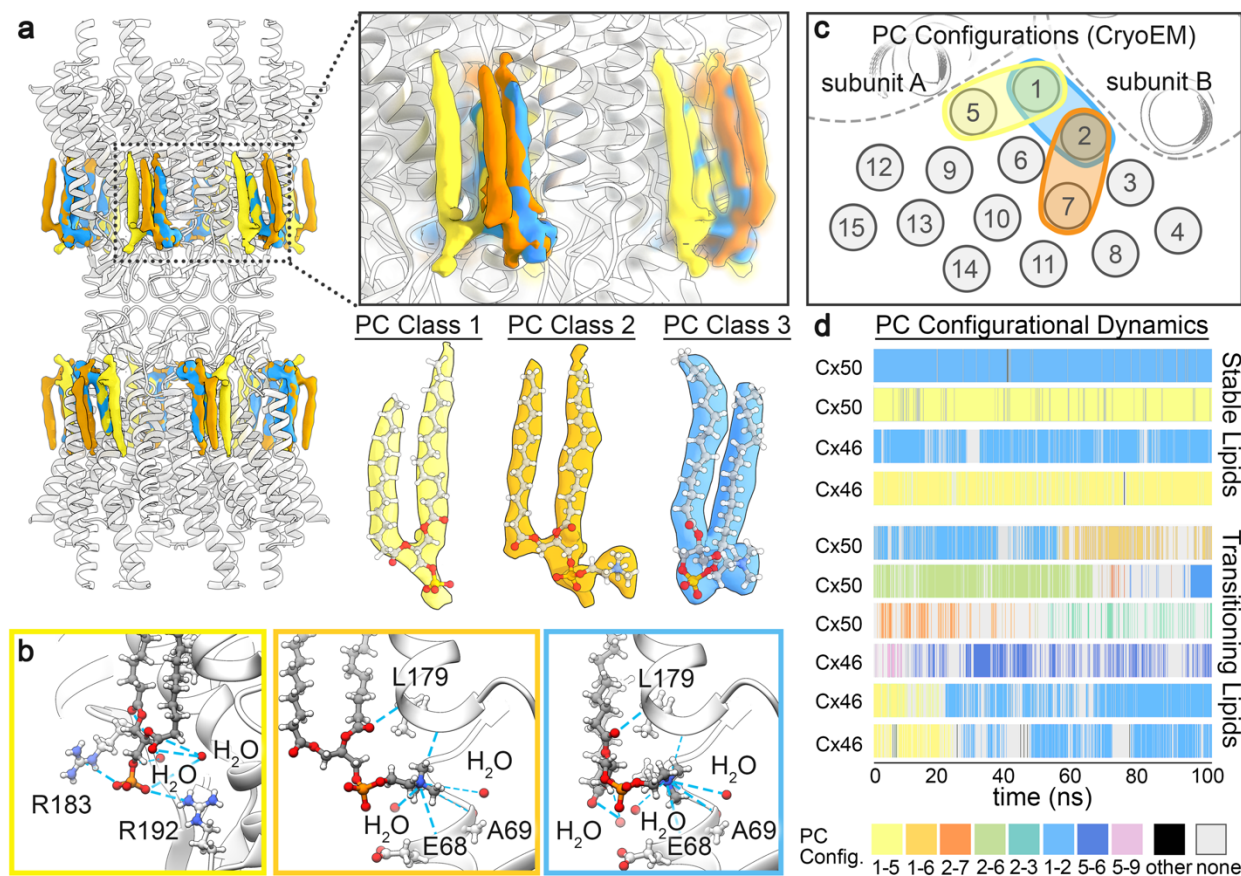

579  
 580 **Figure 4. PC lipid configurational heterogeneity and dynamics resolved by CryoEM and**  
 581 **MD. a)** Segmented phosphatidylcholine (PC) density maps obtained by CryoEM 3D heterogeneity  
 582 analysis and classification (PC Class 1 – yellow, PC Class 2 – orange, PC Class 3 – blue). *Insets*,  
 583 show a zoom-view displaying the overlapping features of resolved lipid configurations, and  
 584 segmented densities with fitted atomic-models obtained from the three PC classes. CryoEM  
 585 density for all other non-unique acyl-lipid chains, with unresolved head groups, have been omitted  
 586 for clarity. **b)** Zoom-view, showing Cx50 hydrogen bond interactions (blue dotted line) between  
 587 the PC lipid headgroup and phospho-glycerol backbone. Interacting amino-acids and stabilized  
 588 water molecules are labeled. Yellow box – PC Class 1, orange box – PC Class 2, blue box – PC  
 589 Class 3. **c)** Illustration, showing acyl-chain positions and configurational assignments resolved by  
 590 CryoEM (represented as grey circles and numbered 1 – 15). **d)** PC configurational classification  
 591 and dwell times obtained by all-atom MD-simulation, showing representative populations of stable  
 592 (non-transitioning) and dynamic (transitioning) lipids. PC configurations were classified by acyl-  
 593 chain occupancy in densities numbered as in panel c, and colored uniquely (as indicated, bottom  
 594 of panel d).



## 595 **Methods**

596

597 **MSP expression and purification.** A plasmid containing the coding sequence for membrane  
598 scaffold protein 1E1 (MSP1E1) was obtained from Addgene<sup>17</sup> and the protein was expressed and  
599 purified as described<sup>55</sup>, with minor modification. Freshly transformed *E. coli* cells (BL21Gold-DE3)  
600 were grown in LB medium containing 50  $\mu\text{g mL}^{-1}$  kanamycin at 37° C with shaking (250 rpm).  
601 Induction with 0.5 mM Isopropyl  $\beta$ -d-1-thiogalactopyranoside (IPTG) was performed when OD<sub>600</sub>  
602 reached 0.5–0.6, and allowed to express for 3–5 hours post-induction at 37° C. Cells were  
603 harvested by centrifugation at 4,000 x *g* for 20 minutes at 4° C, and cell pellets were resuspended  
604 in MSP Lysis Buffer (40 mM Tris [pH 7.4], 1% Triton X-100, 1 mM PMSF) at a density of ~20 mL  
605 of Lysis Buffer per Liter of culture. Cell suspensions were flash frozen in liquid nitrogen and stored  
606 at –86° C for up to several months.

607

608 Frozen cell suspensions were thawed from –86° C storage, supplemented with 1 mM  
609 phenylmethylsulfonyl fluoride (PMSF) and lysed by sonication on ice. Crude lysate was cleared  
610 by ultra-centrifugation at 146,550 x *g* for 30 minutes at 4° C. The supernatant was filtered  
611 (Millipore; 0.22  $\mu\text{m}$ ) and applied to a gravity column with 5 mL of HisPur Ni-NTA resin (Thermo  
612 Fisher Scientific) prepared in equilibration buffer (40mM Tris [pH 7.4]). MSP-bound resin was  
613 washed with 5 column volumes (CV) of equilibration buffer, followed by 5 CVs of each of the  
614 following: Triton buffer (40 mM Tris [pH 8.0], 300 mM NaCl, 1% TX-100), Cholate buffer (40 mM  
615 Tris [pH 8.0], 300 mM NaCl, 50mM cholate), Imidazole Wash Buffer (40 mM Tris [pH 8.0], 300  
616 mM NaCl, 50 mM imidazole). MSP1E1 was eluted with 3 CVs of Elution Buffer (40 mM Tris [pH  
617 8.0], 300 mM NaCl and 750 mM imidazole). The eluate was filtered (Millipore; 0.22  $\mu\text{m}$ ) and  
618 applied to a size exclusion chromatography (SEC) column (ENC70; BioRad) equilibrated in 20  
619 mM HEPES (pH 7.4), 150 mM NaCl and 1 mM EDTA using an FPLC (NGC system; BioRad).  
620 Peak fractions were monitored by UV<sub>280</sub>, pooled and concentrated to 400-600  $\mu\text{M}$  using a  
621 centrifugal device. Final protein concentration was determined by UV absorbance at 280 nm.  
622 Samples were aliquoted, flash frozen in liquid nitrogen and stored at –86° C for up to several  
623 months.

624

625 **Cx46/50 purification and nanodisc reconstitution.** Native Cx46/50 intercellular channels were  
626 isolated as previously described<sup>16</sup>. Briefly, lamb eyes were obtained from the Wolverine Packers  
627 slaughterhouse (Detroit, MI), and the lenses were removed using a surgical blade and stored at

628  $-86^{\circ}$  C. Gap junction intercellular channels were isolated from the core lens fiber tissue,  
629 containing c-terminal truncation variants of Cx46 and Cx50 (*a.k.a.* MP38)<sup>56-59</sup>. Details of the  
630 purification procedure are provided below.

631  
632 Lenses were thawed from  $-86^{\circ}$  C, core lens fiber cell tissue was dissected from the outer cortical  
633 tissue using a surgical blade and stripped core membranes were prepared as described<sup>60-62</sup>. Total  
634 protein concentration was determined by BCA (Pierce) and membranes were stored at  $-86^{\circ}$  C,  
635 in storage buffer (10 mM Tris [pH 8.0], 2 mM EDTA, 2 mM EGTA) at a total protein concentration  
636 of  $\sim 2$  mg mL<sup>-1</sup>. Stripped membranes were thawed from  $-86^{\circ}$  C and solubilized with 10 mM Tris  
637 (pH 8.0), 2 mM EDTA, 2 mM EGTA, 1% (wt vol<sup>-1</sup>) n-decyl- $\beta$ -D-maltoside (DM) for 30 minutes at  
638  $37^{\circ}$  C. Insoluble material was cleared by ultra-centrifugation at 146,550 x g for 30 minutes at  $4^{\circ}$   
639 C. The supernatant was filtered (Millipore; 0.22  $\mu$ m) and separated by anion-exchange  
640 chromatography (UnoQ, BioRad) with buffer A (10 mM Tris [pH 8.0], 2 mM EDTA, 2 mM EGTA,  
641 0.3% DM [wt vol<sup>-1</sup>]). Protein was eluted with a 20 CV gradient of buffer B that additionally  
642 contained 500 mM NaCl. Elution peaks containing Cx46/50, as determined by SDS-PAGE, were  
643 pooled and applied to a size exclusion chromatography (SEC) column (Superose 6 Increase  
644 10/300 GL; GE Healthcare) equilibrated with SEC buffer (20 mM HEPES [pH 7.4], 150 mM NaCl,  
645 2 mM EDTA, 2 mM EGTA and 0.3% DM [wt vol<sup>-1</sup>]). Peak fractions containing purified Cx46/50  
646 were pooled and concentrated to 5–6 mg mL<sup>-1</sup> with a centrifugal device (Vivaspin 6; 50-kDa cut-  
647 off filter; Sartorius). Protein concentration was determined by UV absorbance at 280 nm. All  
648 chromatography steps were performed by FPLC at  $4^{\circ}$  C.

649  
650 Freshly purified Cx46/50 was reconstituted into MSP1E1 nanodiscs using dimyristoylated  
651 phosphatidylcholine (DMPC) lipids, following established procedures<sup>55,63</sup>. Chloroform-solubilized  
652 DMPC (Avanti) was dried under nitrogen gas and left under vacuum overnight to remove residual  
653 solvent. The resulting thin film was resuspended in 5% DM (wt vol<sup>-1</sup>) to a final DMPC concentration  
654 of 30 mM, and solubilized in a sonicator bath at  $37^{\circ}$  C. DM-solubilized Cx46/50 (5–6 mg mL<sup>-1</sup>)  
655 was combined with DMPC at a molar ratio of 0.6:90 (Cx46/50:DMPC) and incubated at  $25^{\circ}$  C with  
656 gentle agitation for 60 minutes. Purified MSP1E1 was then added at a final molar ratio 0.6:1:90  
657 (Cx46/50:MSP1E1:DMPC) and allowed to incubate at  $25^{\circ}$  C for an additional 20 minutes.  
658 Detergent was removed with SM-2 Bio-Beads (BioRad) at a ratio of 30:1 beads:detergent (wt wt<sup>-1</sup>)  
659 by overnight incubation at  $25^{\circ}$  C with gentle agitation. Bio-Beads were removed by filtration and  
660 the sample was ultra-centrifuged at 146,550 x g for 15 minutes at  $4^{\circ}$  C to remove insoluble

661 material. The supernatant was filtered (Millipore; 0.22  $\mu\text{m}$ ) and applied to an SEC column  
662 (Superose 6 Increase 10/300 GL; GE Healthcare) equilibrated in 20 mM HEPES (pH 7.4) and  
663 150mM NaCl, to separate empty nanodiscs from Cx46/50-embedded nanodiscs. Peak fractions  
664 containing both Cx46/50 and MSP1E1, as determined by SDS-PAGE, were collected and  
665 concentrated using a centrifugal device (Vivaspin 6; 50-kDa cut-off filter; Sartorius) to a final  
666 concentration  $\sim 2.5 \text{ mg mL}^{-1}$ , as determined by UV absorbance at 280nm (Extended Data Fig. 1a).  
667 All chromatography steps were performed by FPLC at 4° C. The presence of both Cx46 and Cx50  
668 in the final sample was confirmed by western blot analysis using polyclonal antibodies directed  
669 against the N-terminal domain of Cx46 (AP11570PU-N, Acris) and the N-terminal domain of Cx50  
670 (LS-C116220, LSBio) (Extended Data Fig. 1b).

671  
672 **Negative-stain electron microscopy.** Cx46/50-lipid nanodisc complexes were prepared for  
673 negative stain EM as described<sup>16</sup>. Briefly, a 3  $\mu\text{l}$  drop of sample ( $\sim 0.02 \text{ mg mL}^{-1}$ ) was applied to a  
674 glow-discharged continuous carbon coated EM specimen grid (Ted Pella), blotted with filter paper  
675 and washed two times with detergent-free SEC buffer. The specimen was then stained with  
676 freshly prepared 0.75% (wt vol<sup>-1</sup>) uranyl formate (SPI-Chem).

677  
678 Negatively stained specimens were visualized on a 120kV TEM (iCorr, Thermo Fisher Scientific)  
679 at 49,000x magnification at the specimen level (Extended Data Fig. 1c). A total of 76 digital  
680 micrographs were collected on a 2k x 2k CCD camera (Eagle 2K TEM CCD, Thermo Fisher  
681 Scientific) with a calibrated pixel size of 4.37 Å and with defocus values ranging from 1.5–3.0  $\mu\text{m}$ .  
682 All negative-stain image processing was performed in EMAN2.2<sup>64,65</sup>. After contrast transfer  
683 function (CTF) parameters were determined, micrographs with significant astigmatism or drift  
684 were excluded based on visual inspection of Thon rings in the power spectrum. 7,598 hand-picked  
685 particles were extracted with 84 x 84 pixel box size and subjected to multiple rounds of reference-  
686 free 2D classification, resulting in a final dataset of 3,826 “good” particles. Representative class  
687 averages are shown in (Extended Data Fig. 1c), which revealed dimensions consistent with the  
688 expectation that Cx46/50 intercellular channels had been reconstituted into a pair of lipid-  
689 nanodiscs.

690  
691 **CryoEM specimen preparation and data collection.** Samples were prepared for CryoEM by  
692 applying 5  $\mu\text{l}$  freshly purified Cx46/50-lipid nanodisc complex ( $\sim 2.5 \text{ mg mL}^{-1}$ ) to a glow-discharged  
693 holey carbon grid (Quantifoil R 1.2/1.3, 400 mesh) for 10 seconds. The grid was blotted for 4.0



694 seconds and plunge frozen in liquid ethane using a Vitrobot Mark IV (Thermo Fisher Scientific) at  
695 100% humidity and stored under liquid nitrogen.

696  
697 CryoEM specimen grids were imaged on a Titan Krios (Thermo Fisher Scientific) operated at 300  
698 kV. Dose-fractionated image stacks were recorded on a Falcon 3EC Direct Electron Detector  
699 (Thermo Fisher Scientific) at 120,000x nominal magnification in counting mode, with a calibrated  
700 pixel size of 0.649 Å pixel<sup>-1</sup> (Extended Data Fig. 2a). The dose rate was 1.14 e<sup>-</sup> pixel<sup>-1</sup> sec<sup>-1</sup>, with  
701 5 frames sec<sup>-1</sup> collected for a total exposure of 30 seconds, resulting in a total dose for each  
702 exposure of ~52.5 e<sup>-</sup> Å<sup>-2</sup>. A dataset of 2,087 movies was obtained with nominal defocus values  
703 ranging from 1.0–2.2 μm, and data collection parameters were controlled in an automated manner  
704 using EPU (Thermo Fisher Scientific).

705  
706 **Cryo-EM image processing for high-resolution work-flow.** The full dataset of 2,087 movies  
707 were corrected for beam-induced motion in RELION-3.0<sup>66</sup> and contrast transfer function (CTF)  
708 estimation was performed with Gctf<sup>67</sup> on the non-dose-weighted, aligned micrographs. Laplacian-  
709 of-Gaussian autopicking in RELION-3.0 yielded an initial set of 756,374 picks, which after multiple  
710 rounds of 2D classification left 183,784 *bona fide* particles (binned to a 64-pixel box, 3.894 Å pixel<sup>-1</sup>  
711 <sup>1</sup>). These particles were used to generate a *de novo* initial model in RELION, and subsequent 3D  
712 refinement of these particles yielded a map at 8.0 Å resolution (64 pixel box, 3.894 Å pixel<sup>-1</sup>). This  
713 map was low-pass filtered to 20 Å and projected in 14 unique orientations to perform 3D template-  
714 based autopicking in RELION-3.0 to yield 1,210,797 particle picks. Following multiple rounds of  
715 2D classification, this dataset yielded 379,423 “good” particles (200-pixel box, 1.947 Å pixel<sup>-1</sup>)  
716 (Extended Data Fig. 2b). Particles that had been translated within 20 Å of their nearest neighbor  
717 were removed to prevent invalidation of gold-standard Fourier-shell correlation by duplicate  
718 particles. Removal of 120,228 duplicates yielded a 259,195 refined particle set.

719  
720 This particle set was then re-extracted (1.62 Å pix<sup>-1</sup>, 280-pixel box) and subjected to 3D refinement  
721 (D6 symmetry), yielding a map at 3.3 Å resolution. A subsequent round of de-duplication (20 Å  
722 cut-off) yielded 227,618 particles that were again re-extracted (0.974 Å pix<sup>-1</sup>, 512-pixel box) and  
723 subjected to 3D-refinement (D6 symmetry), which improved the resolution to 3.2 Å. Two rounds  
724 of Bayesian polishing and CTF refinement (per-particle defocus, per-micrograph astigmatism)  
725 with subsequent 3D refinement (D6 symmetry) yielded a map at 2.7 Å resolution. Particles were  
726 then completely unbinned (400-pixel box, 0.649 Å pix<sup>-1</sup>) and subjected to another round of 3D  
727 refinement (D6 symmetry), yielding a map that reached the same resolution prior to unbinning

728 (2.7 Å). Bayesian polishing and subsequent 3D refinement of these particles showed no  
729 significant improvement.

730

731 At this stage, the newly-developed tools in RELION-3.1-beta<sup>68</sup> were implemented to estimate the  
732 degree of beam tilt and high-order aberrations (3-fold and 4-fold astigmatism) present in the  
733 particle images. Subsequent 3D refinement (D6 symmetry) improved the resolution to 2.2 Å.  
734 Particles that had been translated to within 35 Å of their nearest neighbor (6,224 particles) were  
735 again removed to prevent invalidation of the gold-standard Fourier-shell correlation from duplicate  
736 particles. The remaining 221,394 particles were subjected to 3D classification into 2 classes with  
737 D6 symmetry and a tight solvent mask. Approximately ~89% of the particles (196,320) fell into  
738 one class that was subsequently refined to 2.2 Å resolution (D6 symmetry and solvent mask  
739 applied). The remaining 11% of particles (26,005) yielded a 2.0 Å resolution map after 3D  
740 refinement (D6 symmetry and solvent mask applied), and all subsequent processing steps were  
741 performed on this high-resolution particle set.

742

743 Particles were re-extracted with an expanded box size (initially to 448-pixels) to mitigate  
744 delocalized CTF signal from particle images with relatively high defocus. New polishing  
745 parameters were obtained by running the Bayesian polishing job type in RELION-3.1-beta in  
746 “Training mode” on a random 5,000 particle subset of these refined particles. Bayesian polishing  
747 was performed with these new parameters and the subsequent 3D refinement (D6 symmetry and  
748 solvent mask applied) improved the resolution slightly to 1.97 Å. This process was iterated  
749 multiple times with successive increase in box size and incrementally tighter solvent mask applied  
750 during Bayesian polishing until no further improvements were observed, resulting in a final box  
751 size of 540 pixels and refined map at 1.94 Å resolution with D6-symmetry and 2.3 Å resolution  
752 without symmetry (Gold-Standard, 0.143 cut-off)<sup>69</sup> (Extended Data Fig. 2c, 3a). Local resolution  
753 of the final map was estimated in RELION-3.1-beta<sup>68</sup>, and local resolution-filtered maps were  
754 generated for model building (Extended Data Fig. 2d, 3b). A schematic illustrating this high-  
755 resolution CryoEM workflow is presented in (Extended Data Fig. 2c).

756

757 **Cryo-EM image processing workflow for lipid classification.** For classification and analysis  
758 of lipid configurational/conformational heterogeneity, a modified workflow starting from the totally  
759 unbinned 227,618 particle set (0.649 Å pix<sup>-1</sup>, 400-pixel box) which yielded the 2.7 Å resolution  
760 map was applied, as described here (and illustrated in Extended Data Fig. 4a). The particle set  
761 was subjected to 3D classification (eight classes), with D6 symmetry and a generous solvent

762 mask applied. Two of the eight classes yielded maps in which the lipid configuration was  
763 unambiguously resolved: assigned as PC Class 1, containing 9,190 particles (~4% of the data)  
764 and PC Class 3, containing 6,944 particles (~3% of the data). Overlapping configurations were  
765 resolved in two of the other 3D classes, and so particles from these classes were combined and  
766 subjected to a second round of 3D classification with only 2 classes and a tight solvent mask  
767 applied. This yielded one class with unresolved lipid configurations, and a second class in which  
768 the lipid configuration was unambiguously resolved: assigned PC Class 2, containing 6,075  
769 particles (~3% of the data). Particles assigned to PC Class 1, 2, and 3 were separately subjected  
770 to a final round of 3D refinement with a solvent mask and D6 symmetry applied (Extended Data  
771 Fig. 4a). The final reconstructions from particles in each of these classes all reached ~2.5 Å  
772 resolution (Gold-Standard, 0.143 cut-off) (Extended Data Fig. 4b). Local resolution was estimated  
773 in RELION-3.1-beta, and local resolution-filtered maps were generated for model building  
774 (Extended Data Fig. 4c).

775  
776 **Atomic modelling, refinement and validation.** For all atomic models of Cx46 and Cx50, initial  
777 models were derived from previously reported CryoEM structure of amphipol-stabilized Cx46 and  
778 Cx50 (PDB 6MHQ and 6MHY<sup>16</sup>, respectively). Initial models were fit as rigid bodies into the D6-  
779 symmetrized CryoEM maps with applied local resolution-filtering using UCSF Chimera<sup>70</sup>. All atom  
780 models for Cx46 and Cx50 were further built into the CryoEM density maps with COOT<sup>71</sup>, and  
781 subjected to real-space refinement in PHENIX<sup>72</sup> with secondary structure and non-  
782 crystallographic symmetry (D6) restraints applied. Several iterations of manual adjustment of the  
783 protein model in COOT followed by real-space refinement in PHENIX, were performed while  
784 monitoring model quality with MolProbity<sup>73</sup> and quality of side chain fit with EMRinger<sup>74</sup>.  
785 Coordinate and restraint files for the dimyristoylated phosphatidylcholine (DMPC) ligands were  
786 generated with PHENIX eLBOW<sup>75</sup>. DMPC molecules were manually fit into the Cryo-EM density  
787 with COOT. Since density for the phosphatidylcholine (PC) head groups was not resolved in the  
788 high-resolution ensemble CryoEM map (1.9 Å map), head group and acyl chain atoms that could  
789 not be accommodated by the density were deleted. For the PC Lipid Classes 1–3, the  
790 postprocessed maps from RELION were low pass-filtered to 3.5 Å resolution to facilitate modeling  
791 of the fully-resolved PC lipids. COOT was further used to manually place water molecules into  
792 solvent densities of the CryoEM maps. Appropriate placement of waters was determined by the  
793 following three criteria: 1) confirmation of at least two hydrogen bond donor/acceptor interactions  
794 with the FindHBond tool in UCSF Chimera (< 4 Å donor-acceptor distance), 2) confirmation of  
795 solvent densities consistently observed in both gold-standard separated half-maps (contoured  $\geq$

796 2.5  $\sigma$ ), and 3) as an additional measure we looked for density overlap between the local  
797 resolution-filtered Cryo-EM map (contoured  $\geq 5.3 \sigma$ ) and the time-averaged water density map  
798 generated by equilibrium molecular dynamics simulation (contoured  $\geq 5.0 \sigma$ ) to help assign weak  
799 experimental water densities (Extended Data Fig. 8, see calculation of water density maps from  
800 MD described in Methods below). However, not all of the assigned CryoEM water densities were  
801 observed by MD (76% of waters were observed at equivalent positions by CryoEM and MD).  
802 Several iterations of real-space refinement on the entire model were completed until refinement  
803 statistics converged.

804  
805 **Disclosure of unresolved heteromeric/heterotypic assemblies of Cx46/50.** All models of  
806 Cx46 and Cx50 were built using D6 (12-fold) symmetrized CryoEM maps. Because native  
807 Cx46/50 intercellular channels may form homomeric and/or various patterns of  
808 heteromeric/heterotypic configurations<sup>16,76,77</sup>, this map most likely represent a heterogeneous  
809 mixture of these two isoforms<sup>16</sup>. This approach was chosen because all attempts to separate the  
810 heteromeric/heterotypic assembly of these two isoforms using image classification procedures  
811 were unsuccessful (presumably due to the close sequence and structural similarity of these two  
812 isoforms) (see also<sup>16</sup>). Indeed, Cx46 and Cx50 are 80% identical and 89% similar in sequence  
813 over the resolved structural domains, while sites of difference are typically at solvent exposed  
814 regions (Extended Data Fig. 6a). Despite this limitation, all atomic-models generated by this  
815 approach showed good stereo-chemical refinement statistics (see Extended Data Table 1), and  
816 significant improvements to the previously described amphipol-stabilized models that were  
817 refined to 3.4 Å resolution (Extended Data Fig. 5a-e). It is important to note that sites in the density  
818 maps where the sequence of Cx46 and Cx50 are identical or similar, both models fit well into the  
819 D6 symmetrized map, and these regions tend to display well-resolved sidechain density  
820 (Extended Data Fig. 3c,d). Over regions where the sequence of Cx46 and Cx50 differ, sidechain  
821 density is sometimes weaker and/or displays appearance of density consistent with a mixture of  
822 both isoforms (Extended Data Fig. 3c,d). These observations are possibly due to the imposed D6  
823 symmetry averaging of density belonging to two different sidechains in these areas, or relative  
824 flexibility at these sites as many of these residues are also solvent-exposed. In these areas of  
825 difference, where EM density is observed, both Cx46 and Cx50 can be fit into the density equally  
826 well (Extended Data Fig. 3c,d). Nevertheless, caution should be used with interpretation of the  
827 conformational details at these sites of isoform difference.

828

829 **Molecular dynamics simulations.** Visual Molecular Dynamics (VMD) v1.9.3<sup>78</sup> was used to build  
830 systems for sheep Cx46 and Cx50 in a dual lipid-bilayer with varying salt conditions, designed to  
831 mimic either the cellular environment (cytoplasmic KCl, extracellular NaCl) or experimental  
832 CryoEM conditions (uniform NaCl). To produce unbiased analysis of water and lipid interactions,  
833 all water and lipid molecules derived by CryoEM analysis were removed from the Cx46 and Cx50  
834 models prior to the MD setup. Each system comprised the full dodecameric gap junction  
835 intercellular channel, prepared in explicit water (model TIP3P) and embedded in two lipid bilayers  
836 composed of dimyristoylated phosphatidylcholine (DMPC), mimicking the cell-to-cell junction. For  
837 all models, sidechains were protonated according to neutral conditions and the HSD model was  
838 used for all histidine residues. Disulfide bonds identified in the experimental structures were  
839 enforced. Amino acids corresponding to the intracellular loop (ICL; residues 110–136 in sheep  
840 Cx46 and residues 110–148 in sheep Cx50) and c-terminal domain (CTD; residues 225–413 in  
841 sheep Cx46 and residues 237–440 in sheep Cx50) were not included for the MD simulations, as  
842 experimental data describing the structure of these large flexible domains (~30 residue ICL and  
843 ~200 residue CTD in Cx46 and Cx50) are missing. The introduced n- and c-terminal residues  
844 resulting from the missing ICL segment (sheep Cx46 R109 and K137; sheep Cx50 R109 and  
845 R149) were neutralized. All of the systems were modified with an n-terminal acetylation (at the  
846 starting residue Gly 2) in VMD through an all-atom acetylation patch in the automated PSF-  
847 Builder, in accordance with previously described proteomics analysis on native Cx46/50<sup>16,59,79</sup>,  
848 and expectation that this species would predominate in cells<sup>80</sup>. A complete list of modeled  
849 residues for each system is provided in Extended Data Fig. 7a.

850  
851 The prepared protein structures were submerged in a hydration shell using Solvate 1.0.<sup>181</sup> Water  
852 was removed from sections of the channel corresponding to transmembrane domains, based on  
853 hydrophobic character and localization of lipid-nanodisc observed in the experimental CryoEM  
854 data (+/- 20–50 Å from the center of the channel). The CHARMM-GUI membrane-builder<sup>82</sup> was  
855 used to build the DMPC bilayers (pre-melted), with dimensions of 154 x 154 Å for Cx46 and Cx50,  
856 and lipids overlapping with protein were removed. The entire system was then placed in a water  
857 box with dimensions 147 x 147 x 174 Å for both Cx46 and Cx50, using VMD's Solvate plugin. The  
858 system was neutralized using the Autoionize plugin, then 150 mM KCl and 150 mM NaCl was  
859 added to the solvent areas corresponding to intracellular and extracellular regions of the  
860 simulation box for the "KCl" systems, while the "NaCl" systems contained 150 mM NaCl for the  
861 entire box. A summary of atoms counts for each system is provided in Extended Data Fig. 7a.

862

863 CUDA-accelerated nanoscale molecular dynamics (NAMD) 2.13<sup>83</sup> was used for all classical MD  
864 simulations, using the CHARMM36 force-field<sup>84</sup> for all atoms and TIP3P explicit model for water.  
865 Each system was prepared following the same minimization and equilibration protocol, as follows.  
866 An initial minimization step, where the lipids, solvent and ions were allowed to minimize around  
867 the protein was performed, with the protein harmonically constrained for 1 ns, with 1 fs timestep  
868 and constant pressure (NPT ensemble). A second minimization step was applied, where the  
869 system was free to minimize with a harmonic constraint on the protein backbone to ensure stable  
870 quaternary structure for 1 ns – lipids relax and compress during minimization steps with minimized  
871 dimensions equal to the water box (14.7 x 14.7). The entire system was then released from  
872 restraints and subjected to all-atom equilibration runs employing Langevin thermostat, with a  
873 constant temperature of 310 K and constant pressure of 1 atm (NPT ensemble), with 2 fs time-  
874 steps and allowed to proceed for 30 ns. Periodic boundary conditions were used to allow for the  
875 smoothed particle mesh Ewald (PME) calculation of electrostatics. Finally, two independent 100  
876 ns production runs were seeded with randomly initialized velocities from the initial equilibration  
877 simulation – providing 200ns of production for each system. Root mean squared deviations  
878 (r.m.s.d.) and root mean squared fluctuations (r.m.s.f.) were calculated using VMD, and r.m.s.f.  
879 values were displayed to the protein structure using UCSF Chimera (Extended Data Fig. 7b-d).  
880 All systems approached a steady r.m.s.d. within 30 ns of the equilibration phase (Extended Data  
881 Fig. 7b), and r.m.s.f. values appeared well-behaved over the production periods, including regions  
882 corresponding to the NTH domain<sup>16</sup> (Extended Data Fig. 7c,d). The only significant fluctuations  
883 (i.e., > 2.5 Å) occurred at the TM2, TM3 and TM4 cytoplasmic termini, which is expected as these  
884 regions form the boundary to the intrinsically disordered ICL and CTD regions of the protein (not  
885 modeled). All systems maintained an electro-chemical seal to extracellular sodium ions (Na<sup>+</sup>)  
886 around the ECD docking domains during MD simulation.

887  
888 **Calculation of density maps from MD for water, lipids and ions.** The Volmap plugin in VMD  
889 was used for the calculation of volumetric density maps, by replacing each atom with a normalized  
890 gaussian distribution, whose standard deviation is equal to the radius of the atom. All of the  
891 gaussians are summed and distributed on a grid for each frame of the simulation. The grids were  
892 re-sampled to a final voxel resolution of 0.649 Å to match the pixel size used in the CryoEM  
893 reconstruction. Water, ion, and lipid maps were calculated from each of two 100 ns production  
894 runs, and subsequently averaged and symmetrized (D6-symmetry) with the  
895 `relion_image_handler` tool in RELION-3.0<sup>66</sup>. Lipid and water density maps produced from Cx46  
896 and Cx50 MD simulations contained significant overlap to each other and to the CryoEM maps,



897 however, the maps produced from Cx50 MD simulations were of higher quality and were selected  
898 for detailed comparative analysis to the CryoEM density maps (Fig. 3 and Extended Data Fig. 8).  
899 Ion density maps showed only a few features and did not correspond to densities observed by  
900 CryoEM (not shown), and were therefore excluded from further analysis.

901  
902 **MD-based area per lipid (APL) and lipid order parameter ( $S_{CD}$ ) calculations.** Area per lipid  
903 (APL) for each membrane, separated by intracellular and extracellular leaflet, were calculated  
904 using the program FATSLiM<sup>85</sup>, and used as an indicator of equilibration of the lipid systems  
905 (Extended Data Fig. 9a).

906

907 Eq.1 
$$S_{CD} \equiv - \left\langle \frac{3\cos^2(\theta_{CD})-1}{2} \right\rangle$$

908  
909 The  $S_{CD}$  lipid order parameter, as defined by Eq. 1, measures the orientation of the SN1 and SN2  
910 acyl-chains by monitoring the angle that each acyl C-H vector makes with the bilayer normal  $\theta_{CD}$ .  
911 The calculations of  $S_{CD}$  were done using the VMD script *calc\_op.tcl*<sup>86</sup>. To analyze the distance  
912 dependence of  $S_{CD}$  in the respective membrane leaflets, the averaged  $S_{CD}$  values were calculated  
913 in 5 Å concentric shells around the protein (SN1 and SN2 calculated separately).  $S_{CD}$  of lipids  
914 from both membranes are averaged together, while the intra- and extracellular leaflets were  
915 averaged separately (Extended Data Fig. 9b-e). To visualize the order parameter mapped to the  
916 structure, the time-averaged  $S_{CD}$  values were calculated for each lipid (SN1 and SN2 combined  
917 values for acyl carbons 4–11), and colored according to this value using UCSF Chimera (Fig. 3c).  
918

919 **MD lipid configuration analysis.** Analysis of PC lipid configuration (*i.e.*, acyl-chain positioning)  
920 was performed using in-house scripts to assess how phospholipids are organized within the  
921 extracellular leaflet of the Cx46 and Cx50 intercellular channels during MD simulation, as  
922 compared to the PC configurations classified by CryoEM. This was done by counting the  
923 instances of a single DMPC molecule occupying the region bounded by the MD-based lipid-  
924 density, contoured at  $\sigma_{min} = 8$  (Fig. 3a). The lipid acyl-chain density maps calculated from the  
925 Cx50 MD simulations reveal more than 19 resolved rods (*i*) of density per connexin subunit (12  
926 subunits), and each rod was arbitrarily numbered 1 through 19 (total of 228 acyl-chain positions).  
927 A lipid was classified in a state when both acyl-chains occupied a density, *state*  $\equiv$  "*i* –  
928 *j*" (*where*  $i \neq j$ ). A rod density is considered occupied if at least 5 carbons of a lipid's acyl-chain  
929 are within the density, such that  $\sigma_{carbon} \geq \sigma_{min}$ . This classification scheme was applied to every



930 lipid within 15 Å of the protein, over each frame (0.1 ns per frame). To analyze the dynamics of  
931 lipids surrounding the protein, the state of each lipid (e.g., “1–2”, “1–5”, “none”, etc.) was  
932 monitored and recorded at every frame providing a time series of lipid configurational dynamics  
933 in state-space (Fig. 4d).

934

935 **Statistical analysis.** 95% confidence intervals for C $\alpha$  r.m.s.f. values are reported (n=24) using a  
936 two-tailed student t-test. Fourier-Shell Correlation (FSC) was performed using Gold-Standard  
937 methods with a 0.143 cut-off criteria<sup>69</sup>. No statistical methods were used to predetermine sample  
938 size for the CryoEM dataset. The experiments were not randomized, and investigators were not  
939 blinded to allocation during experiments and outcome assessment.

940

941

942 **Data Availability**

943 CryoEM density maps have been deposited to the Electron Microscopy Data Bank (EMD-XXXX).

944 Coordinates for Cx46 and Cx50 atomic models have been deposited to the Protein Data Bank

945 (XXXX and XXXX). The original multi-frame micrographs have been deposited to EMPIAR

946 (EMPIAR-XXXXX).

947

948

949 **Additional References**

- 950 55 Ritchie, T. K. *et al.* Chapter 11 - Reconstitution of membrane proteins in phospholipid  
951 bilayer nanodiscs. *Methods Enzymol* **464**, 211-231, doi:10.1016/S0076-6879(09)64011-8  
952 (2009).
- 953 56 Kistler, J., Christie, D. & Bullivant, S. Homologies between gap junction proteins in lens,  
954 heart and liver. *Nature* **331**, 721-723, doi:10.1038/331721a0 (1988).
- 955 57 Kistler, J., Schaller, J. & Sigrist, H. MP38 contains the membrane-embedded domain of  
956 the lens fiber gap junction protein MP70. *The Journal of biological chemistry* **265**, 13357-  
957 13361 (1990).
- 958 58 White, T. W., Bruzzone, R., Goodenough, D. A. & Paul, D. L. Mouse Cx50, a functional  
959 member of the connexin family of gap junction proteins, is the lens fiber protein MP70. *Mol*  
960 *Biol Cell* **3**, 711-720 (1992).
- 961 59 Wang, Z. & Schey, K. L. Phosphorylation and truncation sites of bovine lens connexin 46  
962 and connexin 50. *Exp Eye Res* **89**, 898-904, doi:10.1016/j.exer.2009.07.015 (2009).
- 963 60 Reichow, S. L. *et al.* Allosteric mechanism of water-channel gating by Ca<sup>2+</sup>-calmodulin.  
964 *Nat Struct Mol Biol* **20**, 1085-1092, doi:10.1038/nsmb.2630 (2013).
- 965 61 Gold, M. G. *et al.* AKAP2 anchors PKA with aquaporin-0 to support ocular lens  
966 transparency. *EMBO Mol Med* **4**, 15-26, doi:10.1002/emmm.201100184 (2012).
- 967 62 Reichow, S. L. & Gonen, T. Noncanonical binding of calmodulin to aquaporin-0:  
968 implications for channel regulation. *Structure* **16**, 1389-1398,  
969 doi:10.1016/j.str.2008.06.011 (2008).
- 970 63 Efremov, R. G., Gatsogiannis, C. & Raunser, S. Lipid Nanodiscs as a Tool for High-  
971 Resolution Structure Determination of Membrane Proteins by Single-Particle Cryo-EM.  
972 *Methods Enzymol* **594**, 1-30, doi:10.1016/bs.mie.2017.05.007 (2017).
- 973 64 Tang, G. *et al.* EMAN2: an extensible image processing suite for electron microscopy. *J*  
974 *Struct Biol* **157**, 38-46, doi:10.1016/j.jsb.2006.05.009 (2007).
- 975 65 Ludtke, S. J. Single-Particle Refinement and Variability Analysis in EMAN2.1. *Methods*  
976 *Enzymol* **579**, 159-189, doi:10.1016/bs.mie.2016.05.001 (2016).
- 977 66 Zivanov, J. *et al.* New tools for automated high-resolution cryo-EM structure determination  
978 in RELION-3. *eLife* **7**, doi:10.7554/eLife.42166 (2018).
- 979 67 Zhang, K. Gctf: Real-time CTF determination and correction. *J Struct Biol* **193**, 1-12,  
980 doi:10.1016/j.jsb.2015.11.003 (2016).
- 981 68 Zivanov, J., Nakane, T. & Scheres, S. H. W. Estimation of high-order aberrations and  
982 anisotropic magnification from cryo-EM data sets in RELION-3.1. *IUCrJ* **7**, 253-267,  
983 doi:10.1107/S2052252520000081 (2020).
- 984 69 Scheres, S. H. & Chen, S. Prevention of overfitting in cryo-EM structure determination.  
985 *Nat Methods* **9**, 853-854, doi:10.1038/nmeth.2115 (2012).
- 986 70 Pettersen, E. F. *et al.* UCSF Chimera--a visualization system for exploratory research and  
987 analysis. *J Comput Chem* **25**, 1605-1612, doi:10.1002/jcc.20084 (2004).
- 988 71 Emsley, P., Lohkamp, B., Scott, W. G. & Cowtan, K. Features and development of Coot.  
989 *Acta Crystallogr.* **D66**, 486-501 (2010).

- 990 72 Afonine, P. V. *et al.* Real-space refinement in PHENIX for cryo-EM and crystallography.  
991 *Acta Crystallogr D Struct Biol* **74**, 531-544, doi:10.1107/S2059798318006551 (2018).
- 992 73 Williams, C. J. *et al.* MolProbity: More and better reference data for improved all-atom  
993 structure validation. *Protein Sci* **27**, 293-315, doi:10.1002/pro.3330 (2018).
- 994 74 Barad, B. A. *et al.* EMRinger: side chain-directed model and map validation for 3D cryo-  
995 electron microscopy. *Nat Methods* **12**, 943-946, doi:10.1038/nmeth.3541 (2015).
- 996 75 Moriarty, N. W., Grosse-Kunstleve, R. W. & Adams, P. D. electronic Ligand Builder and  
997 Optimization Workbench (eLBOW): a tool for ligand coordinate and restraint generation.  
998 *Acta Crystallogr D Biol Crystallogr* **65**, 1074-1080, doi:10.1107/S0907444909029436  
999 (2009).
- 1000 76 Konig, N. & Zampighi, G. A. Purification of bovine lens cell-to-cell channels composed of  
1001 connexin44 and connexin50. *J Cell Sci* **108 ( Pt 9)**, 3091-3098 (1995).
- 1002 77 Jiang, J. X. & Goodenough, D. A. Heteromeric connexons in lens gap junction channels.  
1003 *Proc Natl Acad Sci U S A* **93**, 1287-1291 (1996).
- 1004 78 Humphrey, W., Dalke, A. & Schulten, K. VMD: visual molecular dynamics. *J Mol Graph*  
1005 **14**, 33-38, 27-38 (1996).
- 1006 79 Shearer, D., Ens, W., Standing, K. & Valdimarsson, G. Posttranslational modifications in  
1007 lens fiber connexins identified by off-line-HPLC MALDI-quadrupole time-of-flight mass  
1008 spectrometry. *Invest Ophthalmol Vis Sci* **49**, 1553-1562, doi:10.1167/iovs.07-1193 (2008).
- 1009 80 Varland, S., Osberg, C. & Arnesen, T. N-terminal modifications of cellular proteins: The  
1010 enzymes involved, their substrate specificities and biological effects. *Proteomics* **15**, 2385-  
1011 2401, doi:10.1002/pmic.201400619 (2015).
- 1012 81 Grubmuller, H., Heymann, B. & Tavan, P. Ligand binding: molecular mechanics  
1013 calculation of the streptavidin-biotin rupture force. *Science* **271**, 997-999 (1996).
- 1014 82 Wu, E. L. *et al.* CHARMM-GUI Membrane Builder toward realistic biological membrane  
1015 simulations. *J Comput Chem* **35**, 1997-2004, doi:10.1002/jcc.23702 (2014).
- 1016 83 Phillips, J. C. *et al.* Scalable molecular dynamics with NAMD. *J Comput Chem* **26**, 1781-  
1017 1802, doi:10.1002/jcc.20289 (2005).
- 1018 84 Huang, J. & MacKerell, A. D., Jr. CHARMM36 all-atom additive protein force field:  
1019 validation based on comparison to NMR data. *J Comput Chem* **34**, 2135-2145,  
1020 doi:10.1002/jcc.23354 (2013).
- 1021 85 Buchoux, S. FATSLiM: a fast and robust software to analyze MD simulations of  
1022 membranes. *Bioinformatics* **33**, 133-134, doi:10.1093/bioinformatics/btw563 (2017).
- 1023 86 Piggot, T. J., Allison, J. R., Sessions, R. B. & Essex, J. W. On the Calculation of Acyl  
1024 Chain Order Parameters from Lipid Simulations. *J Chem Theory Comput* **13**, 5683-5696,  
1025 doi:10.1021/acs.jctc.7b00643 (2017).
- 1026 87 Donaldson, P. & Kistler, J. Reconstitution of channels from preparations enriched in lens  
1027 gap junction protein MP70. *J Membr Biol* **129**, 155-165 (1992).
- 1028 88 Smart, O. S., Neduvilil, J. G., Wang, X., Wallace, B. A. & Sansom, M. S. HOLE: a program  
1029 for the analysis of the pore dimensions of ion channel structural models. *J Mol Graph* **14**,  
1030 354-360, 376 (1996).
- 1031

1032 **Extended Data Tables and Figures**

1033

1034 **Extended Data Table 1**

|                                                  | Cx46         | Cx50         | Cx46<br><i>PC Class 1</i> | Cx50<br><i>PC Class 1</i> | Cx46<br><i>PC Class 2</i> | Cx50<br><i>PC Class 2</i> | Cx46<br><i>PC Class 3</i> | Cx50<br><i>PC Class 3</i> |
|--------------------------------------------------|--------------|--------------|---------------------------|---------------------------|---------------------------|---------------------------|---------------------------|---------------------------|
| <b>Data collection and processing</b>            |              |              |                           |                           |                           |                           |                           |                           |
| Magnification                                    | 120,000      | 120,000      | 120,000                   | 120,000                   | 120,000                   | 120,000                   | 120,000                   | 120,000                   |
| Voltage (kV)                                     | 300          | 300          | 300                       | 300                       | 300                       | 300                       | 300                       | 300                       |
| Electron exposure (e-/Å <sup>2</sup> )           | 52.5         | 52.5         | 52.5                      | 52.5                      | 52.5                      | 52.5                      | 52.5                      | 52.5                      |
| Defocus range (µm)                               | -1.0 to -2.2 | -1.0 to -2.2 | -1.0 to -2.2              | -1.0 to -2.2              | -1.0 to -2.2              | -1.0 to -2.2              | -1.0 to -2.2              | -1.0 to -2.2              |
| Pixel size (Å)                                   | 0.649        | 0.649        | 0.649                     | 0.649                     | 0.649                     | 0.649                     | 0.649                     | 0.649                     |
| Symmetry imposed                                 | D6           | D6           | D6                        | D6                        | D6                        | D6                        | D6                        | D6                        |
| Initial particle images (no.)                    | 1,210,797    | 1,210,797    | 1,210,797                 | 1,210,797                 | 1,210,797                 | 1,210,797                 | 1,210,797                 | 1,210,797                 |
| Final particle images (no.)                      | 26,005       | 26,005       | 6,073                     | 6,073                     | 9,188                     | 9,188                     | 6,942                     | 6,942                     |
| Map resolution (Å)                               | 1.94         | 1.94         | 2.52                      | 2.52                      | 2.47                      | 2.47                      | 2.45                      | 2.45                      |
| FSC threshold                                    | 0.143        | 0.143        | 0.143                     | 0.143                     | 0.143                     | 0.143                     | 0.143                     | 0.143                     |
| Map resolution range (Å)                         | 1.94–3.30    | 1.94–3.30    | 2.42–4.56                 | 2.42–4.56                 | 2.33–4.14                 | 2.33–4.14                 | 2.47–4.33                 | 2.47–4.33                 |
| <b>Refinement</b>                                |              |              |                           |                           |                           |                           |                           |                           |
| Initial model used (PDB code)                    | 6MHQ         | 6MHY         | 6MHQ                      | 6MHY                      | 6MHQ                      | 6MHY                      | 6MHQ                      | 6MHY                      |
| Model resolution (Å)                             | 1.9          | 1.9          | 2.5                       | 2.5                       | 2.4                       | 2.4                       | 2.6                       | 2.7                       |
| FSC threshold                                    | 0.5          | 0.5          | 0.5                       | 0.5                       | 0.5                       | 0.5                       | 0.5                       | 0.5                       |
| Map sharpening <i>B</i> factor (Å <sup>2</sup> ) | -26.28       | -26.28       | -40.49                    | -40.49                    | -45.42                    | -45.42                    | -43.73                    | -43.73                    |
| <b>Model composition</b>                         |              |              |                           |                           |                           |                           |                           |                           |
| Non-hydrogen atoms                               | 21,876       | 21,804       | 22,308                    | 22,176                    | 21,624                    | 21,552                    | 21,312                    | 21,240                    |
| Protein residues                                 | 2352         | 2352         | 2,328                     | 2,328                     | 2,316                     | 2,316                     | 2,304                     | 2,304                     |
| Ligands                                          | 180          | 180          | 168                       | 168                       | 132                       | 132                       | 144                       | 144                       |
| <b><i>B</i> factors (Å<sup>2</sup>)</b>          |              |              |                           |                           |                           |                           |                           |                           |
| Protein                                          | 31.48        | 30.10        | 51.09                     | 50.04                     | 41.92                     | 47.13                     | 59.04                     | 57.75                     |
| Ligand                                           | 32.95        | 30.94        | 55.25                     | 55.19                     | 43.92                     | 47.64                     | 61.77                     | 60.83                     |
| <b>R.m.s. deviations</b>                         |              |              |                           |                           |                           |                           |                           |                           |
| Bond lengths (Å)                                 | 0.006        | 0.006        | 0.010                     | 0.007                     | 0.009                     | 0.009                     | 0.007                     | 0.010                     |
| Bond angles (°)                                  | 0.784        | 0.785        | 0.825                     | 0.821                     | 0.934                     | 1.073                     | 0.816                     | 0.762                     |
| <b>Validation</b>                                |              |              |                           |                           |                           |                           |                           |                           |
| MolProbity score                                 | 1.09         | 1.07         | 1.03                      | 1.03                      | 1.13                      | 1.22                      | 0.98                      | 1.06                      |
| Clashscore                                       | 2.98         | 2.61         | 2.45                      | 2.46                      | 2.90                      | 3.93                      | 2.07                      | 2.72                      |
| Poor rotamers (%)                                | 0.57         | 0.56         | 0.00                      | 0.56                      | 1.17                      | 1.14                      | 0.00                      | 0.57                      |
| <b>Ramachandran plot</b>                         |              |              |                           |                           |                           |                           |                           |                           |
| Favored (%)                                      | 98.44        | 97.92        | 98.11                     | 98.95                     | 98.41                     | 98.94                     | 98.40                     | 98.40                     |
| Allowed (%)                                      | 1.56         | 2.08         | 1.89                      | 1.05                      | 1.59                      | 1.06                      | 1.60                      | 1.60                      |
| Disallowed (%)                                   | 0.00         | 0.00         | 0.00                      | 0.00                      | 0.00                      | 0.00                      | 0.00                      | 0.00                      |

1035

1036 **Extended Data Table 1. CryoEM Statistics.** Summary of CryoEM data collection, refinement

1037 and model validation statistics. The ensemble CryoEM dataset was used to obtain the 1.9 Å

1038 resolution reconstruction and atomic models for Cx46 and Cx50, including 396 water molecules

1039 and 150 lipid acyl-chains. 3D classification was used to obtain the three PC classes, and

1040 associated atomic models for Cx46 and Cx50 (PC Class 1–3). Pre-processed and post-processed

1041 maps and associated masks from all datasets have been deposited to the EM databank (EMD-

1042 XXXX). The original multi-frame micrographs have been deposited to EMPIAR (EMPIAR-XXXX).

1043 Coordinates for Cx50 and Cx46 atomic models have been deposited to the Protein Data Bank

1044 (XXXX and XXXX correspond to the ~1.9 Å models, XXXX and XXXX correspond to the ~2.5 Å

1045 models from PC Class 1; XXXX and XXXX correspond to PC Class 2; and XXXX and XXXX

1046 correspond to PC Class 3).



1047 **Extended Data Figure 1**

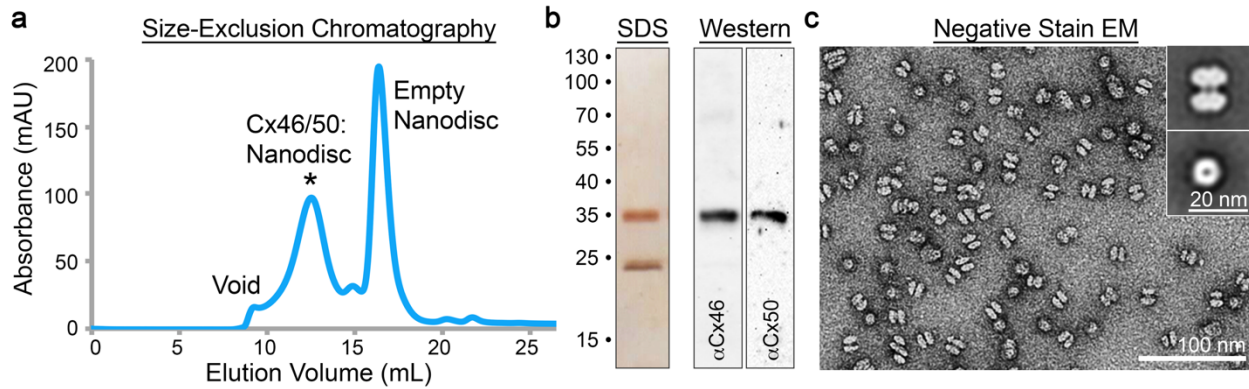

1048

1049 **Extended Data Figure 1. Cx46/50 reconstitution into MSP1E1/DMPC lipid-nanodiscs and**

1050 **negative stain EM. a)** Size-exclusion chromatography (SEC) trace monitored by UV absorbance

1051 at 280 nm. Peaks corresponding to Cx46/50 reconstituted into MSP1E1/DMPC nanodiscs (\*),

1052 empty nanodisc and void are indicated. **b)** SDS-PAGE (*left*) and western blot (*right*) of peak SEC

1053 fraction (labeled \*), with molecular weight markers indicated. MSP1E1 migrates as a ~24 kDa

1054 band (predicted MW ~27.5 kDa). Cx46 and Cx50 migrate together at ~38 kDa band, as expected

1055 from c-terminal truncation from core lens fiber cells<sup>16</sup>, and confirmed by western blot (*right*). **c)**

1056 Electron micrograph of negatively stained particles from SEC fraction (labeled \*), with scale bar

1057 = 100 nm. *Inset*, shows representative 2D class averages of sideview (*top*) and top view (*bottom*),

1058 with scale bar = 20 nm. Particles display dumbbell-like structures corresponding to Cx46/50 gap

1059 junctions intercellular channels<sup>16,87</sup>, embedded into a pair of ~10-11 nm wide nanodiscs (MSP1E1

1060 nanodiscs have a predicted diameter of ~10.5 nm<sup>17</sup>).

1061

1062

1063 **Extended Data Figure 2**

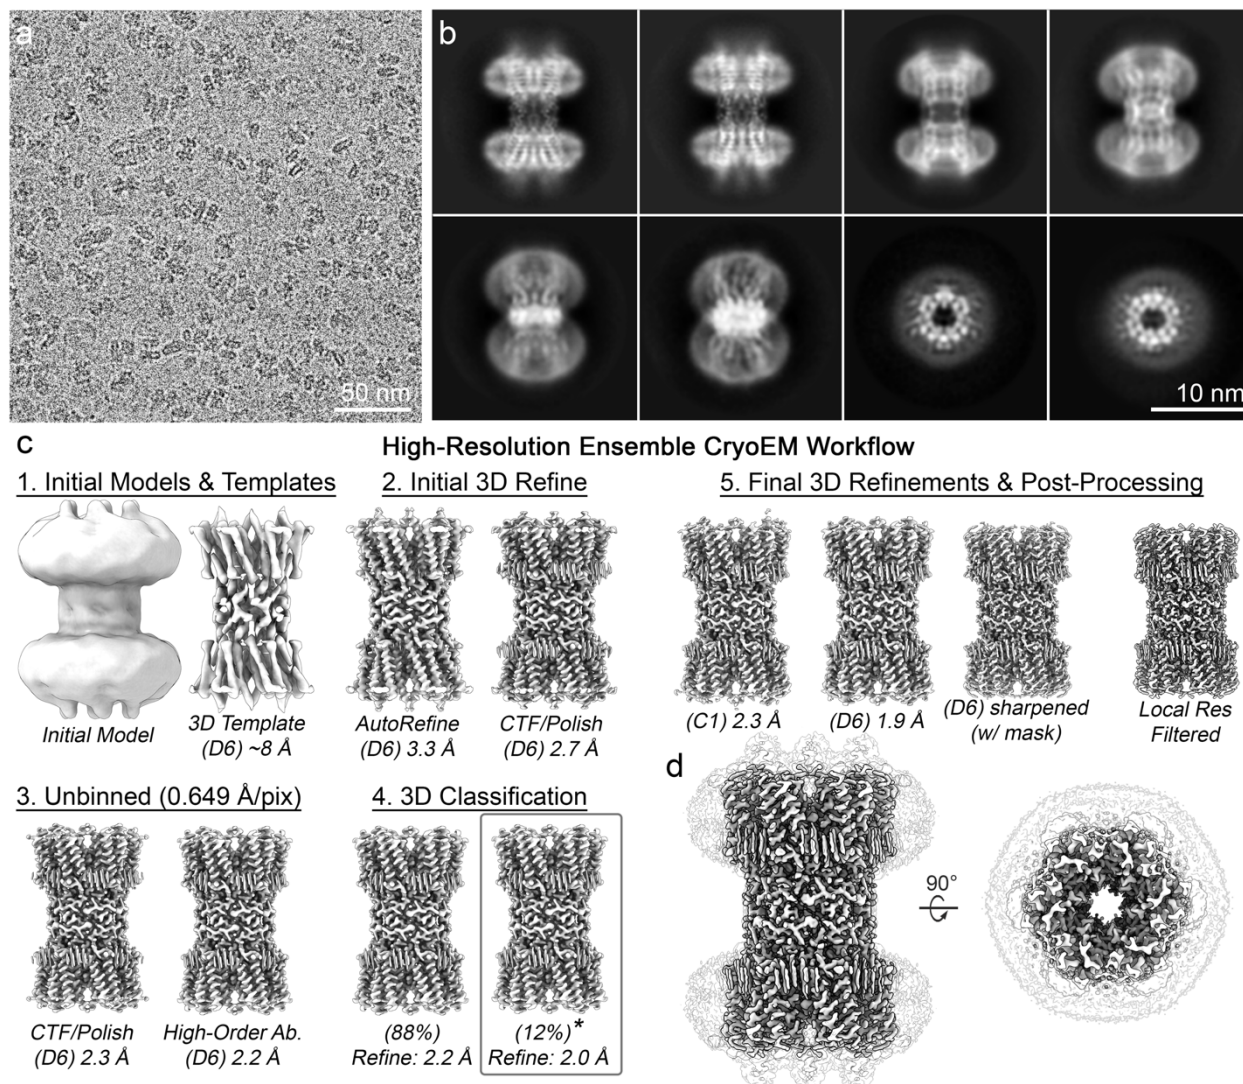

1064  
 1065 **Extended Data Figure 2. CryoEM image processing workflow for 1.9 Å ensemble**  
 1066 **reconstruction of Cx46/50 in DMPC lipid nanodiscs.** a) Representative CryoEM micrograph  
 1067 (dataset of 2088 movies) recorded on a Falcon III detector, with physical pixel size = 0.649 Å<sup>2</sup>  
 1068 and total dose of ~60 e<sup>-</sup> per Å<sup>2</sup>. Scale bar = 50 nm. b) Representative 2D class averages. Scale  
 1069 bar = 10 nm. c) Image processing and 3D reconstruction workflow carried out in Relion<sup>66,68</sup>, with  
 1070 representative maps at different stages of the image processing pipeline. Step 1) *De-novo* model  
 1071 generated in Relion (*left*) and initial 3D AutoRefinement with D6-symmetry (~8 Å resolution, 3.9  
 1072 Å pixel size) (*right*), which was then filtered to 20 Å and used for 3D template auto-picking in  
 1073 Relion (resulting in ~1.2M particle picks, which were culled to ~228k “good” particles following  
 1074 multiple rounds of 2D classification and de-duplication). Step 2) Resulting 3D AutoRefine with D6-  
 1075 symmetry (3.2 Å resolution, 0.97 Å pixel size) (*left*), and resulting map following per particle CTF-

1076 refinement and polishing in Relion (2.7 Å) (*right*). 3) Particles were unbinned (pixel size 0.649  
1077 Å/pix, box size = 400 pix) and refined with per-particle CTF-correction and polishing (2.3 Å) (*left*),  
1078 and further refinement of high-order aberration parameters in Relion v3.1-beta<sup>68</sup> (2.2 Å) (*right*).  
1079 Step 3) Particles were de-duplicated, resulting in a set of ~221k particles, and subjected to 3D  
1080 classification (two classes). Class 1 contained 88% of the particles and was further refined to 2.2  
1081 Å resolution (*left*). Class 2 contained 12% of the particles and was further refined to 2.0 Å  
1082 resolution (*right, asterisk*). Step 4) Particles belonging to Class 2 (~26k particles), were then  
1083 subjected to multiple rounds of 3D Auto-refinement followed by per-particle CTF, aberration-  
1084 correction and polishing, using successively larger box-sizes until no further improvement,  
1085 resulting in a final reconstruction at 2.3 Å resolution (C1 symmetry) (*left*) and 1.9 Å resolution (D6  
1086 symmetry) (*center, left*). The D6-symmetrized map was then subjected to post-processing (b-  
1087 factor sharpening) (*center, right*) and local-resolution filtering in Relion (*right*) for downstream  
1088 analysis. **d)** Final reconstruction of Cx46/50 following local resolution filtering, used for atomic-  
1089 modeling. Transparent silhouette displays the unmasked map at low-contour to illustrate the  
1090 dimensions of the lipid nanodisc densities.

1091

1092



1093 **Extended Data Figure 3**

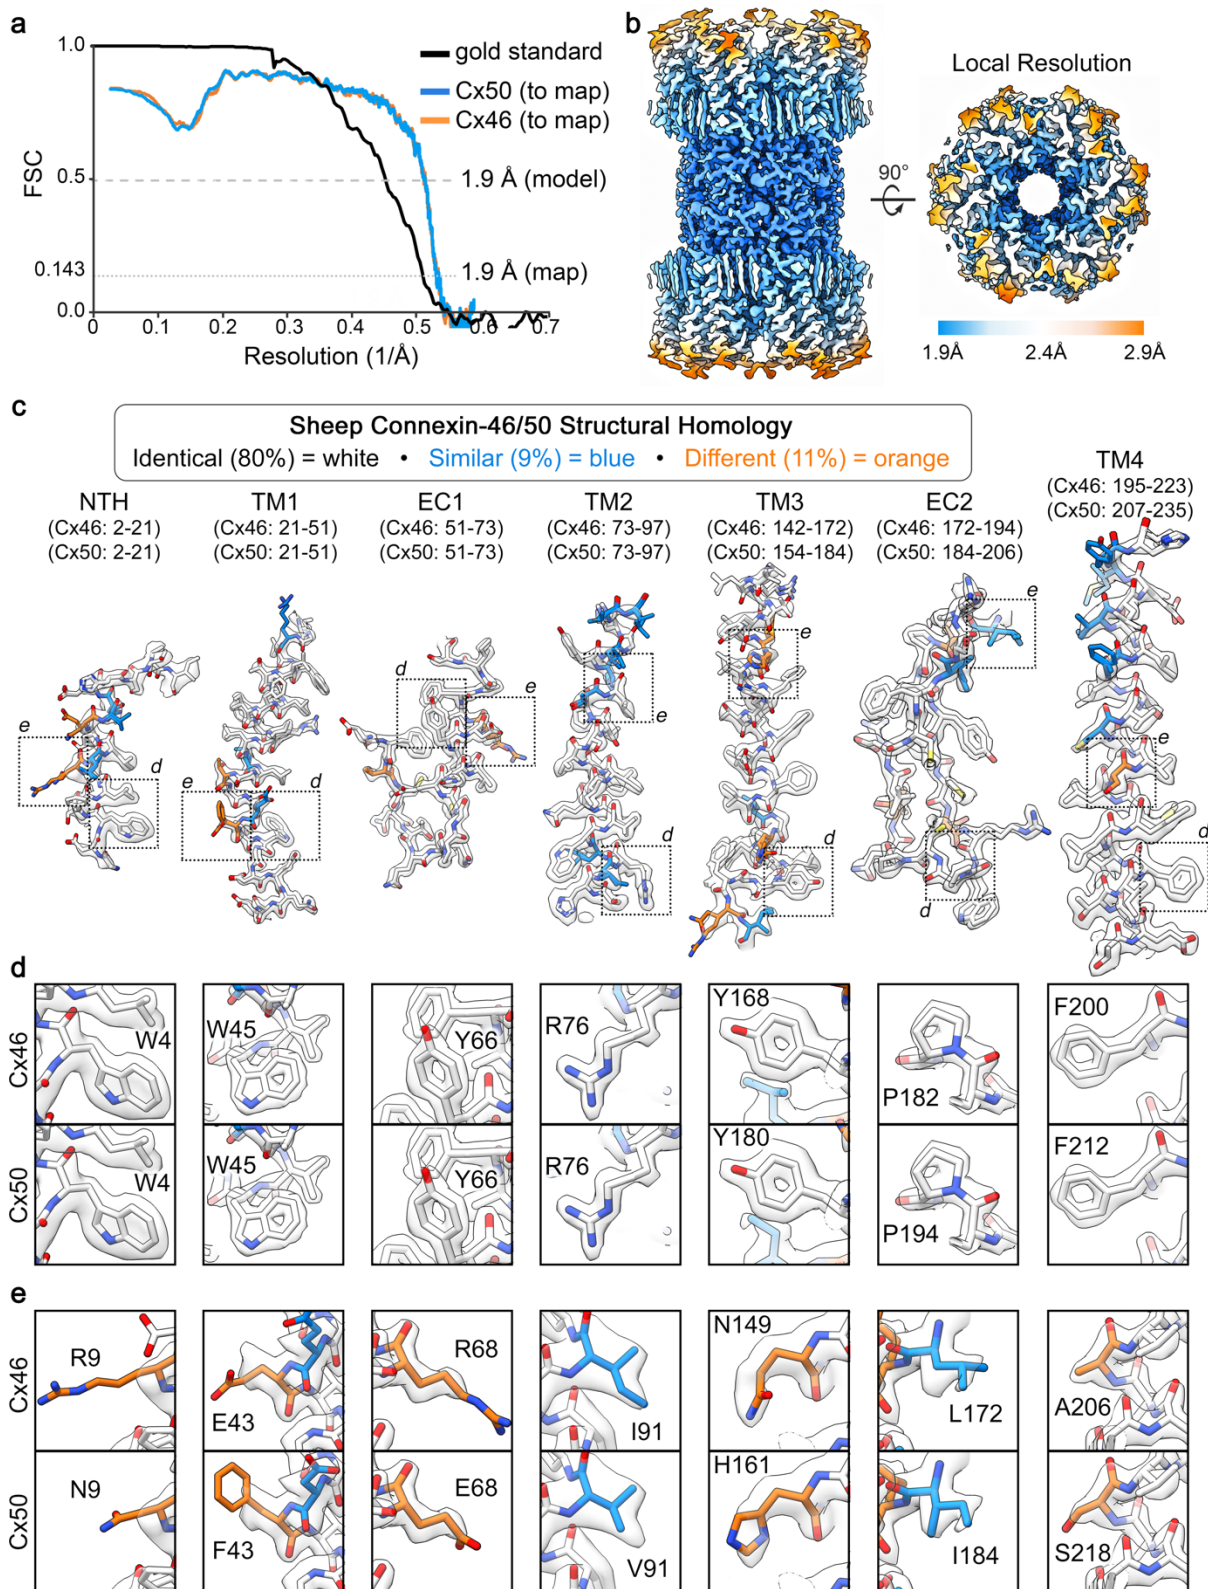

1094

1095 **Extended Data Figure 3. Global and local resolution assessment of the 1.9 Å ensemble**  
1096 **reconstruction of Cx46/50 in DMPC lipid nanodiscs. a)** Fourier Shell Correlation (FSC)  
1097 analysis obtained from the ensemble CryoEM map of Cx46/50 in DMPC lipid nanodiscs. Gold-  
1098 standard FSC (black) of the final refined CryoEM map indicates a global resolution of 1.9 Å (0.143  
1099 cut-off). FSC curves comparing atomic models for Cx50 (blue) and Cx46 (orange) fit to the final  
1100 CryoEM map display overall correlation at 1.9 Å (0.5 cut-off). **b)** Local resolution analysis of the  
1101 final CryoEM map using Relion<sup>68</sup>, displayed by colored surface (1.9 – 2.4 Å = blue – white; 2.4 –  
1102 2.9 Å = white – orange). **c)** Segmented CryoEM map with regions of the atomic models for sheep  
1103 Connexin-46 (Cx46) and Connexin-50 (Cx50) fit to the local-resolution filtered map. Residue  
1104 numbering for Cx46 and Cx50 is displayed above the corresponding segments for the n-terminal  
1105 helix domain (NTH) domain, the transmembrane domains 1-4 (TM1-4) and extracellular domains  
1106 1-2 (EC1-2), Residues are colored according to the pair-wise sequence homology between sheep  
1107 Cx46 and Cx50, as being identical (white, 80%), similar (blue, 9%) and different (orange, 11%),  
1108 with all heteroatoms colored by standard scheme (oxygen – red; nitrogen – blue, sulfur – yellow).  
1109 **d, e)** Windows show zoom-views corresponding to boxed regions of the segmented maps. **d)**  
1110 Displays fits over representative regions where both Cx46/50 contain identical amino acids, where  
1111 the high-resolution features are well-resolved. **e)** Displays fits over representative regions where  
1112 the sequence of Cx46 and Cx50 differ, and where sidechain density is weaker and/or consistent  
1113 with heterogeneity. This is presumably due to the heteromeric/heterotypic mixture of these  
1114 isoforms<sup>16,76,77</sup> and the imposed averaging of two different sidechains in these areas, and/or to  
1115 relative flexibility at these sites, as many of these same residues correspond to solvent/lipid  
1116 exposed sidechains (e.g., R9/N9; E43/F43, R68/E68, I91/V91 and A206/S218).  
1117  
1118

1119 **Extended Data Figure 4**

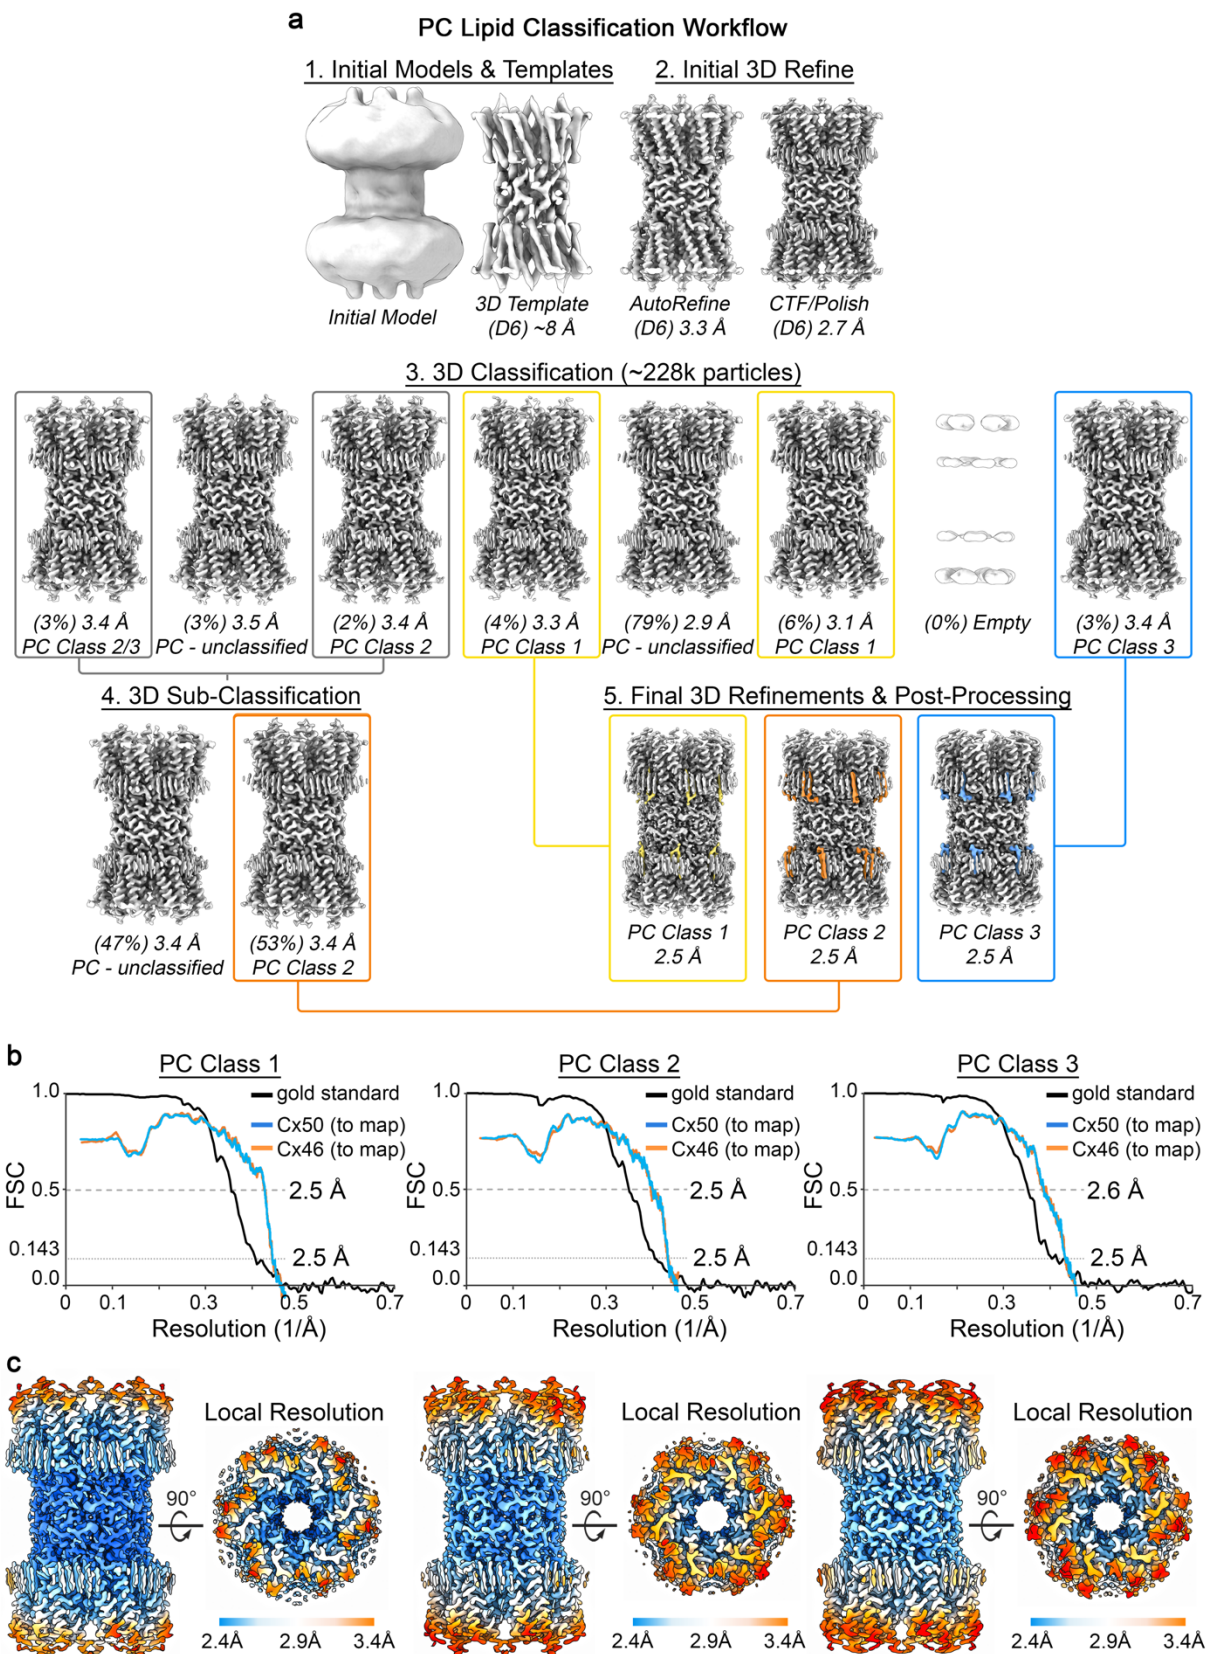

1120



1121 **Extended Data Figure 4. Image processing and resolution assessment for 3D lipid-**  
1122 **classification work-flow. a)** Image process and 3D reconstruction workflow carried out in Relion  
1123 for the analysis of PC lipid configuration/conformational heterogeneity, with representative maps  
1124 at different stages of the image processing pipeline. Steps 1 and 2) are the same as described in  
1125 Extended Data Fig. 2, which resulted in a 2.7 Å reconstruction from a dataset of ~228k “good”  
1126 particles (*right*). Step 3) These particles were unbinned and re-extracted (0.649 Å/pix, 400 pixel  
1127 box), and subjected to 3D classification (eight classes) without image alignment. Two of the eight  
1128 classes yielded maps in which the lipid configuration was unambiguously resolved: assigned as  
1129 PC Class 1 (yellow box), containing 9,190 particles (~4% of the data) and PC Class 3 (blue box),  
1130 containing 6,944 particles (~3% of the data). Overlapping configurations were resolved in two of  
1131 the other 3D classes (grey boxes). Step 4) The particles from these overlapping classes (grey  
1132 boxes) were combined and subjected to a second round of 3D classification with two classes.  
1133 This yielded one in which the lipid configuration was unambiguously resolved: assigned PC Class  
1134 2 (orange box), containing 6,075 particles (~3% of the data). Step 5) Particles assigned to PC  
1135 Class 1 (*left*), PC Class 2 (*center*) and PC Class 3 (*right*) were separately subjected to a final  
1136 round of 3D refinement and per-particle polishing, with D6 symmetry applied, resulting in final  
1137 reconstructions ~2.5 Å resolution (Gold-Standard, 0.143 cut-off). **b)** Fourier Shell Correlation  
1138 (FSC) analysis obtained for PC Class 1 (*left*), PC Class 2 (*center*) and PC Class 3 (*right*). Gold-  
1139 standard FSC (black) of the final refined, masked and post-processed CryoEM map indicates a  
1140 global resolution of 2.5 Å (0.143 cut-off). FSC curves comparing atomic models for Cx50 (blue)  
1141 and Cx46 (orange) fit to the final CryoEM maps display overall correlation at 2.5–2.6 Å (0.5 cut-  
1142 off). **c)** Local resolution analysis of the final CryoEM maps for PC Class 1 (*left*), PC Class 2  
1143 (*center*) and PC Class 3 (*right*) using Relion, displayed by colored surface (2.4 – 2.9 Å = blue –  
1144 white; 2.9 – 3.4 Å = white – orange).  
1145  
1146

1147 **Extended Data Figure 5**

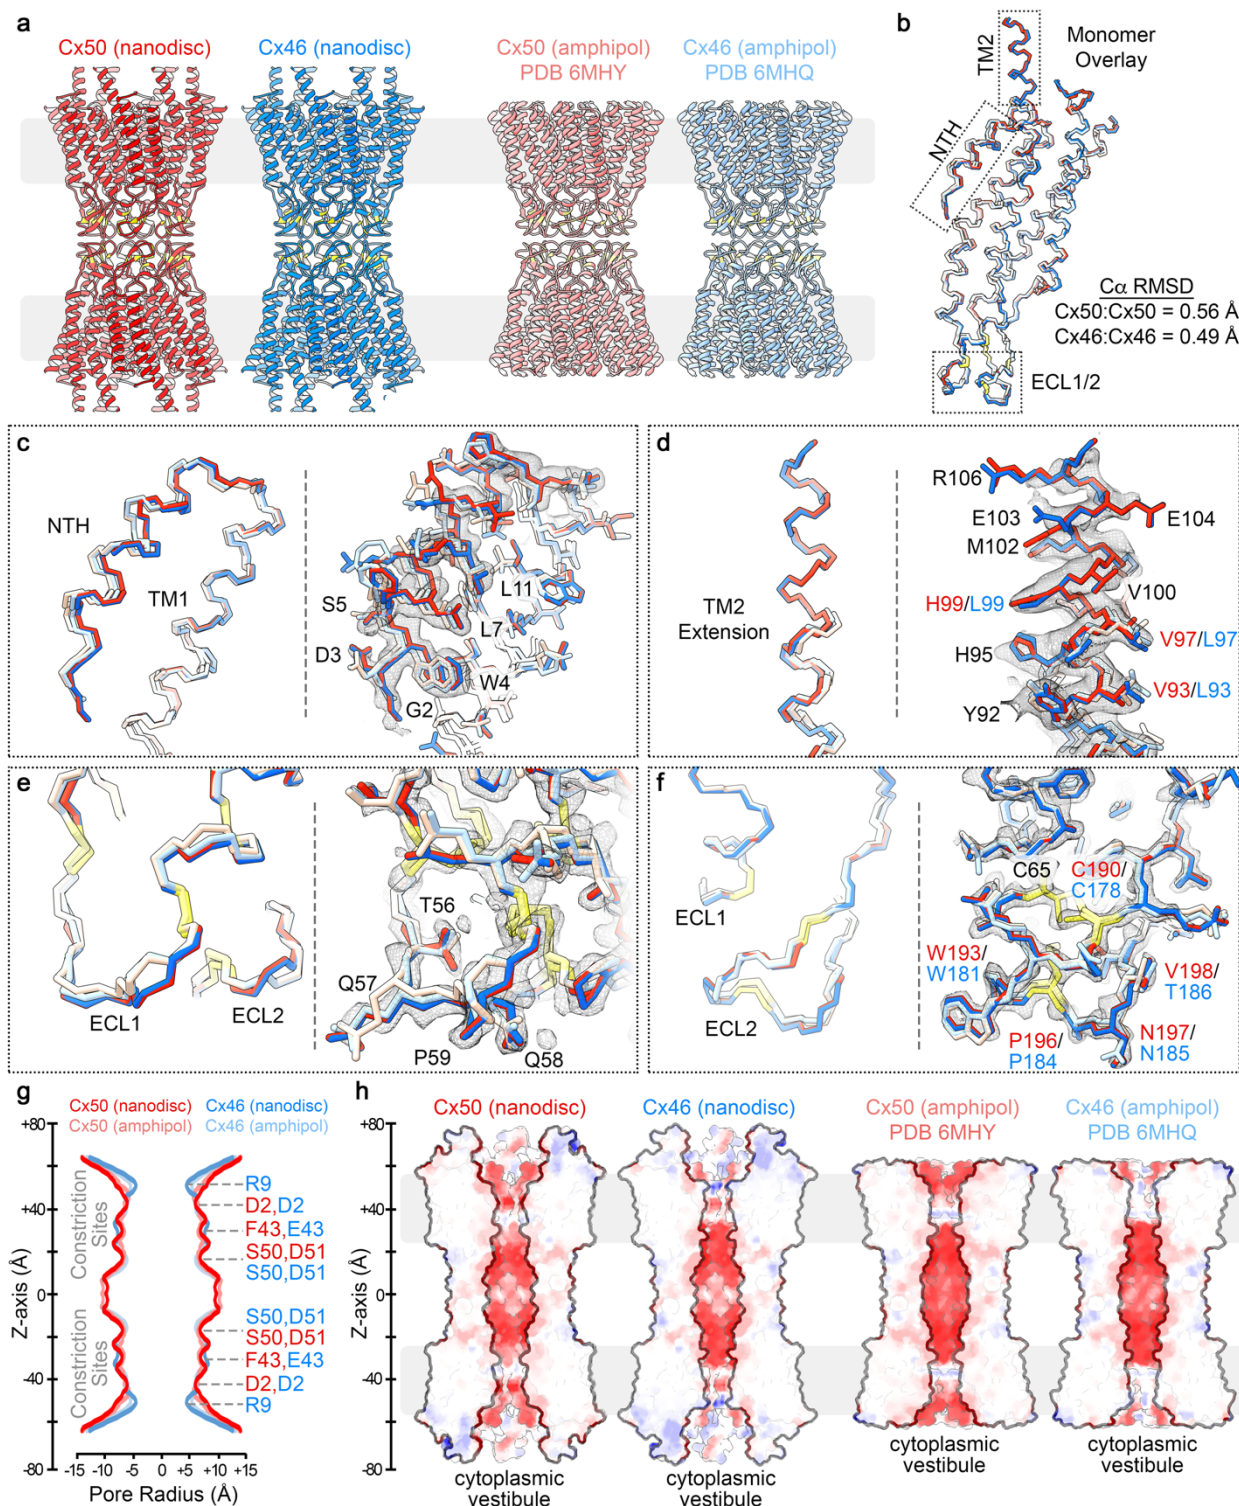

1148  
 1149 **Extended Data Figure 5. Comparison of Cx46/50 structures determined in amphipol and**  
 1150 **lipid-nanodiscs. a)** Ribbon structures of Cx50 (red) and Cx46 (blue) determined by CryoEM in  
 1151 lipid-nanodisc (left) and as previously determined in amphipol (right) with Cx50 (light red, PDB

1152 6MHY) and Cx46 (light blue, PDB 6MHQ)<sup>16</sup>. Regions of lipid bilayer are indicated by light grey  
1153 box. Conserved cysteine positions within the EC1/2 domains, involved in disulfide formation, are  
1154 indicated in yellow. **b)** C $\alpha$  traces over-laid for these four models, corresponding to a single subunit  
1155 following super-positioning (colored as in panel a). C $\alpha$  r.m.s.d. following super-positioning is  
1156 indicated for Cx50 (nanodisc) vs. Cx50 (amphipol) = 0.56 Å, and Cx46 (nanodisc) vs. Cx46  
1157 (amphipol) = 0.49 Å. **c–f)** Shows zoom views corresponding to the boxed regions in panel b. For  
1158 each panel, (left) shows C $\alpha$  trace and (right) shows all atom fit into the 1.9 Å CryoEM density map  
1159 obtained from the nanodisc embedded structure, to show regions of improved fit to the  
1160 experimental density map. Highlighted residues are indicated, and labels colored according to  
1161 identity between the Cx50 and Cx46 isoforms (black – identical, red – Cx50 and blue – Cx46). **g)**  
1162 Pore radius determined using HOLE<sup>88</sup>, for experimental structures of Cx50-nanodisc (red), Cx46-  
1163 nanodisc (blue), Cx50-amphipol (light red) and Cx46-amphipol (light blue). Locations  
1164 corresponding to constriction sites are indicated, and residues contributing to these sites of  
1165 constriction for both isoforms are labeled (Cx50 – red; Cx46 – blue). **h)** Cut-away surface  
1166 representation of Cx50-nanodisc (*left*), Cx46-nanodisc (*left center*) and Cx50-amphipol (*right*  
1167 *center*) and Cx46-amphipol (*right*), colored by coulombic potential (negative – red, neutral – white  
1168 and positive – blue). This comparison illustrates the electrostatic environment of the permeation  
1169 pathways and the extension of the intra-cellular vestibule that is resolved in the Cx46/50-nanodisc  
1170 models, as compared to the previously described Cx46/50-amphipol models.

1171

1172



1173 **Extended Data Figure 6**

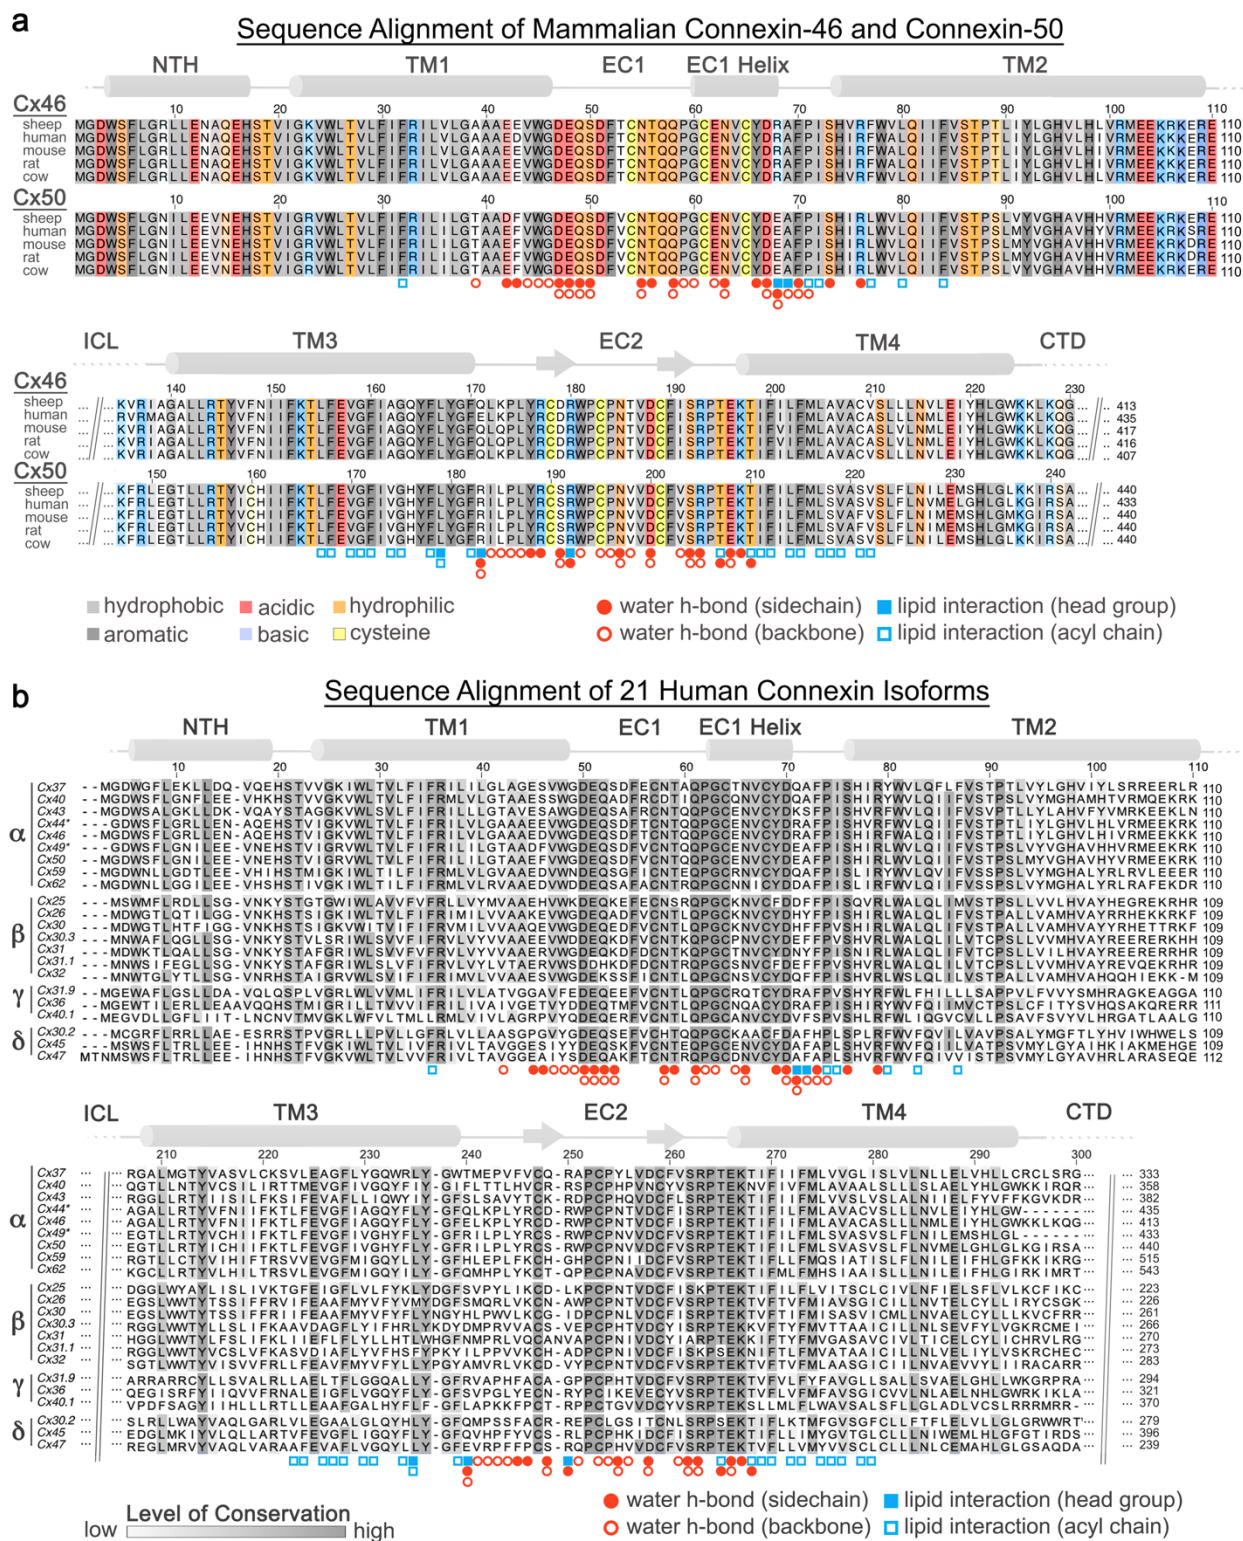

1174  
1175 **Extended Data Figure 6. Sequence alignment with annotated lipid and water binding sites.**  
1176 **a) Multiple sequence alignment of mammalian Cx46 and Cx50 isoforms with residues contributing**

1177 to lipid and/or water binding sites annotated (filled circle – water h-bonding with amino acid  
1178 sidechain; open circle – water h-bonding with amino acid backbone) and (filled square –  
1179 interaction involving lipid headgroup; open square – interaction involving lipid acyl chain). Primary  
1180 sequence coloring corresponds to amino acid type (grey – hydrophobic; dark grey – aromatic; red  
1181 – acidic; blue – basic; orange – hydrophilic; yellow – cysteine). Regions of sequence homology  
1182 are indicated by the level of shading. Secondary structure and domain labels are indicated for the  
1183 n-terminal helix (NTH), transmembrane helices (TM1-4) and extracellular domains (EC1-2).  
1184 Regions lacking defined structure and of poor sequence homology within the intracellular loop  
1185 (ICL) and c-terminal domain (CTD) have been omitted for clarity. Sheep and human Cx46 and  
1186 Cx50 orthologs contain ~95% sequence identity (~98% similarity) over the structured regions of  
1187 the protein. Numbering corresponds to the amino acid sequence of sheep Cx44 and Cx49 used  
1188 in the main text. **b)** Multiple sequence alignment of 20 human connexin isoforms, with sheep Cx44  
1189 (Cx46 homolog) and Cx49 (Cx50 homolog) included for comparison. Isoforms are categorized by  
1190 connexin family  $\alpha$ ,  $\beta$ ,  $\gamma$  and  $\delta$ . The orphan Cx23 was excluded from analysis. Regions of sequence  
1191 homology are indicated by the level grey of shading. Annotations for lipid and water binding sites  
1192 and secondary structural elements/domains are indicated as in panel a.  
1193  
1194

1195 **Extended Data Figure 7**

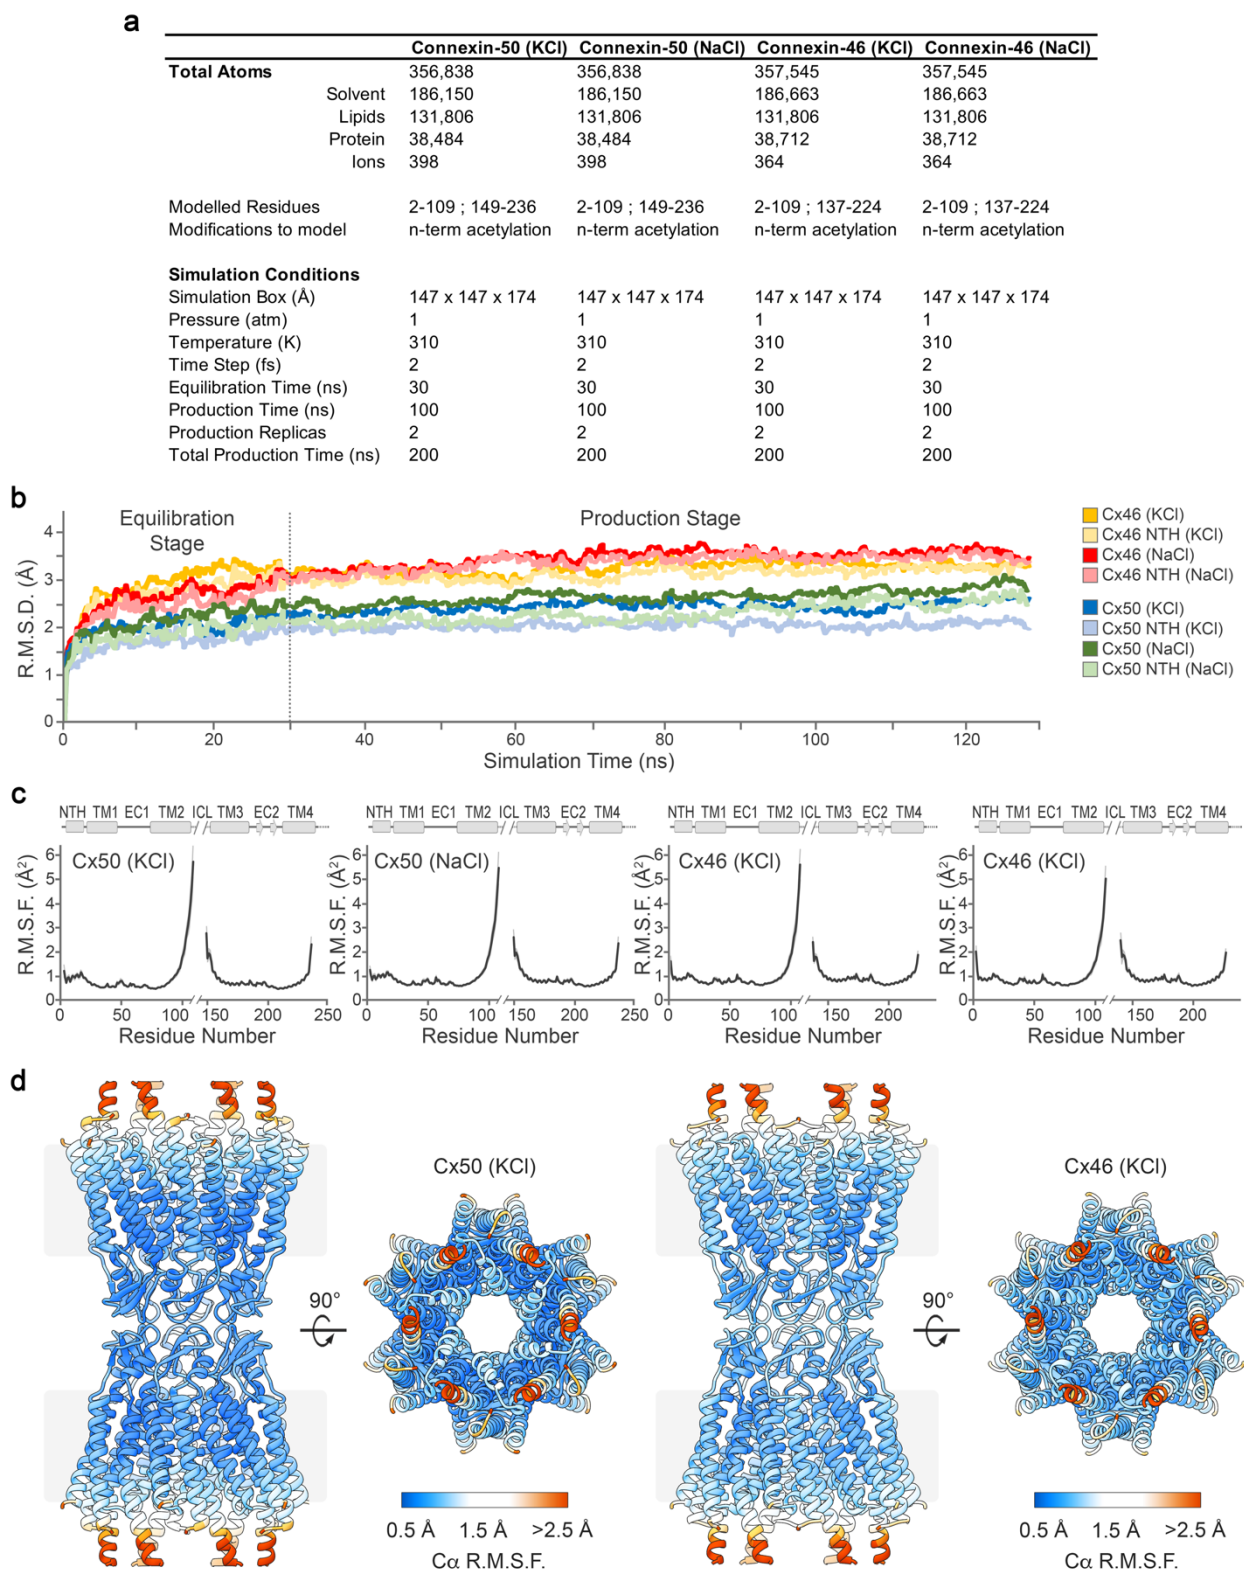

1196



1197 **Extended Data Figure 7. Molecular dynamics setup and validation. a)** Summary of molecular  
1198 dynamics (MD) simulation setup and conditions. Each simulation was setup similarly, using and  
1199 explicit solvent model containing either KCl (Cx50KCl; Cx46 KCl) or NaCl (Cx50 NaCl; Cx46 NaCl)  
1200 in the cytoplasmic space, to match either cellular or *in vitro* conditions used for CryoEM studies,  
1201 respectively. All simulations were conducted with NaCl in the extracellular space and using DMPC  
1202 as the lipid system. Following minimization, all systems were equilibrated for 30 ns at 37° C, and  
1203 multiple replicates (N=2) of production (100 ns each) were acquired for analysis at 37° C. **b)** C $\alpha$   
1204 root mean squared deviation (r.m.s.d.) analysis of equilibrium (0 – 30 ns) and production phases  
1205 (30–130 ns) of the MD simulations, calculated with respect to the experimental starting structures,  
1206 where Cx50 KCl (blue traces); Cx50 NaCl (green traces); Cx46 KCl (orange traces); Cx46 NaCl  
1207 (red traces). Separate analysis for the n-terminal helix (NTH) domains are shown in lighter  
1208 shades. **c)** Plot of average C $\alpha$  root mean squared fluctuation (*r.m.s.f.*) during the production phase  
1209 of the molecular dynamics (MD) simulations for Cx50 KCl (*left*), Cx50 NaCl (*left center*) Cx46 KCl  
1210 (*right center*) and Cx46 NaCl (*right*). Averages are determined for the 12 subunits composing the  
1211 intercellular channel, analyzed for both independent productions. Error bars (light grey shading)  
1212 represent 95% confidence intervals (n = 24). Secondary structure and domain labels are indicated  
1213 for the n-terminal helix (NTH), transmembrane helices (TM1-4), extracellular domains (EC1-2)  
1214 and intracellular loop (ICL; not modeled). **d)** Representative r.m.s.f. values mapped to the  
1215 experimental starting structures of Cx50 KCl (*left*) and Cx46 KCl (*right*). Colors correspond to  
1216 r.m.s.f. amplitudes: < 0.5 Å (blue) – 1.5 Å (white) – 2.5 Å (red).  
1217  
1218

1219 **Extended Data Figure 8**

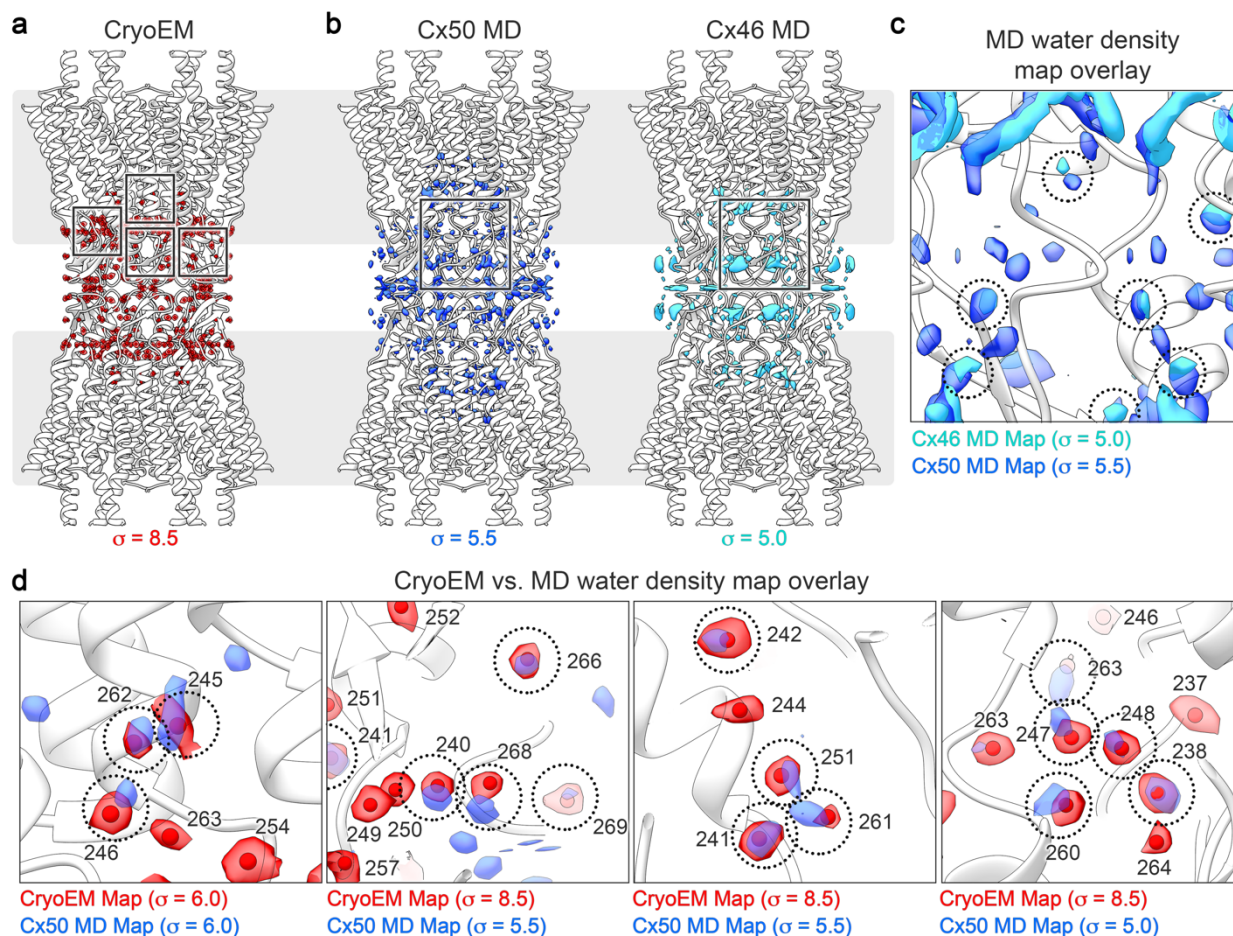

1220

1221 **Extended Data Figure 8. Analysis of MD-based water density maps.** **a)** Ribbon structure of

1222 Cx46/50 with segmented water densities from the ensemble CryoEM map (red density, threshold

1223 = 8.5  $\sigma$ ). **b)** Ribbon structures of Cx50/46 with overlaid time-averaged and symmetrized water

1224 density maps calculated from MD-simulation for Cx50 (*left*; blue density, threshold = 5.5  $\sigma$ ) and

1225 Cx46 (*right*; cyan density, threshold = 5.0  $\sigma$ ). **c)** Zoom view, corresponding to boxed regions in

1226 panels b and c, showing overlaid MD-based water densities. Representative regions of

1227 overlapping density are circled. **d)** Zoom views of boxed regions in panel a, showing

1228 representative regions of CryoEM water densities (red) overlaid the Cx50 MD-based water density

1229 map (blue). Identities of modeled waters are indicated (using Cx50 numbering). Representative

1230 regions of overlapping density are circled. 76% of waters modeled into the CryoEM map show

1231 corresponding density in the MD-based water maps. Density map threshold values ( $\sigma$ ) used for

1232 visualization in each panel are indicated.

1233

1234

1235 **Extended Data Figure 9**

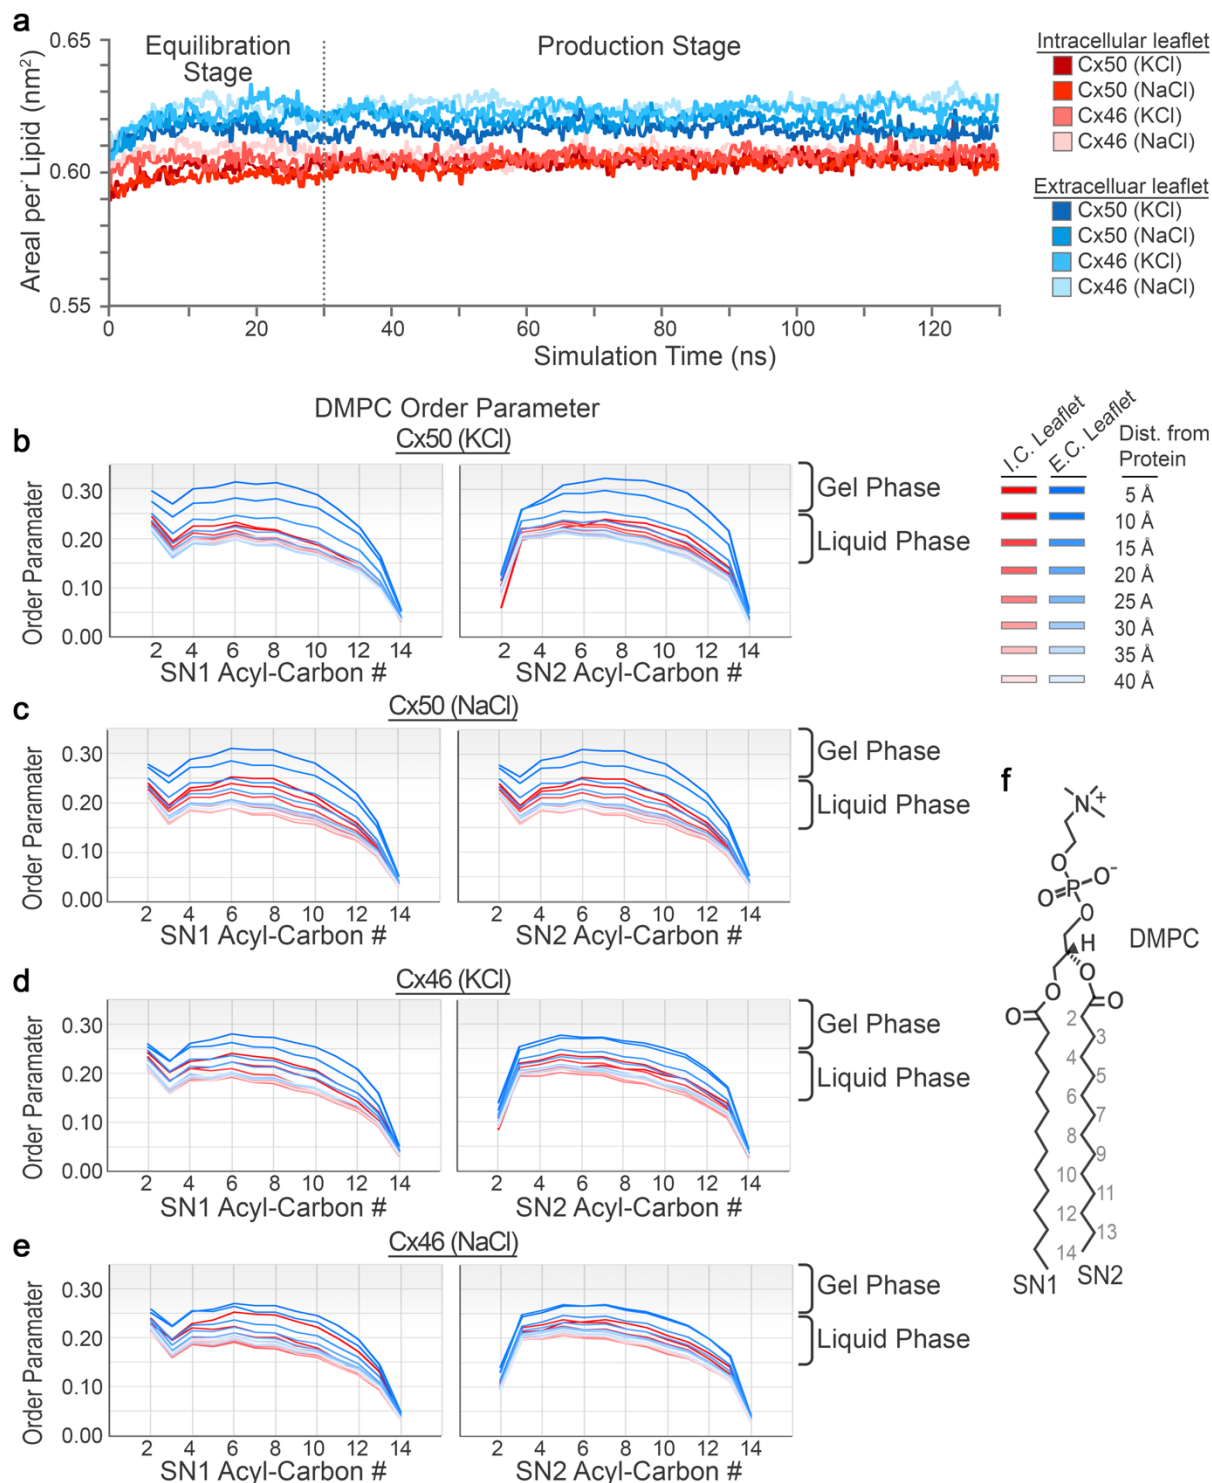

1236  
1237 **Extended Data Figure 9. Analysis of MD-based lipid dynamics.** a) Lipid equilibration was  
1238 monitored by analyzing the averaged area per lipid ( $\text{nm}^2$ ) over the duration of MD-simulation.  
1239 Traces correspond to lipids from the extracellular leaflets (blue shades) and intracellular leaflets

1240 (red shades) for each system (Cx50 KCl, Cx50 NaCl, Cx46 KCl and Cx46 NaCl) are displayed.  
1241 **b-e**) Averaged lipid order parameters calculated for the SN1 (*left*) and SN2 (*right*) acyl-chain C-H  
1242 bonds ( $S_{CD}$ ) for each system (*panel b*, Cx50 KCl; *panel c*, Cx50 NaCl; *panel d*, Cx46 KCl; and  
1243 *panel e*, Cx46 NaCl). Traces correspond to lipids from the intracellular leaflets (red, *I.C. leaflet*)  
1244 and extracellular leaflets (blue, *E.C. leaflet*), with dark to light shading showing the radial distance  
1245 dependence from the surface of the protein (5 Å shells). **f**) Structure of dimyristoyl  
1246 phosphatidylcholine (DMPC) with SN1 and SN2 acyl-chains labeled.  
1247  
1248

1249 **Supplemental Movie Legends**

1250

1251 **Supplemental Movie 1. CryoEM map of Cx46/50 in a dual lipid nanodisc system resolved**  
1252 **at 1.9 Å resolution.** The CryoEM map has been segmented and colored with Cx46/50 (white),  
1253 resolved lipid acyl-chains (blue) and water molecules (red). *Inset*, shows a zoom-view of the  
1254 CryoEM map (transparent) with fitted atomic model of Cx50 (stick representation).

1255

1256 **Supplemental Movie 2. Model of Cx46/50 intercellular channel with associated lipids and**  
1257 **water molecules.** Cx46/50 is displayed (cylinder representation) with lipid acyl-chains (blue and  
1258 white spheres) and ordered water molecules displayed (red spheres).

1259

1260 **Supplemental Movie 3. Model of Cx46/50 monomer with associated lipids and water**  
1261 **molecules.** Cx46/50 is displayed (cylinder representation) with 15 lipid acyl-chains (blue and  
1262 white spheres) and 33 ordered water molecules displayed (red spheres).

1263

1264 **Supplemental Movie 4. Super-positioning of stabilized annular lipids observed by MD-**  
1265 **simulation.** MD-trajectory, showing an ensemble super-positioning of symmetry-related DMPC  
1266 lipids (displayed as all atom representation) occupying the MD-based lipid acyl-chain density map  
1267 (blue). Cx46/50 is displayed in ribbon representation (white) and held static for visualization  
1268 purposes.

1269

1270 **Supplemental Movie 5. Representative examples of stable PC lipid configurations**  
1271 **classified from MD-simulation.** MD-trajectories, showing representative examples of DMPC  
1272 lipids displayed as all atom representation (blue) occupying the MD-based lipid acyl-chain density  
1273 map (grey mesh) that were classified as occupying stable configurational states (labeled, as  
1274 indicated in Main Fig. 4c,d).

1275

1276 **Supplemental Movie 6. Representative examples of transitioning PC lipid configurations**  
1277 **classified from MD-simulation.** MD-trajectories, showing representative examples of DMPC  
1278 lipids displayed as all atom representation (blue) occupying the MD-based lipid acyl-chain density  
1279 map (grey mesh) that were classified as transitioning between multiple configurational states  
1280 (labeled; as indicated in Main Fig. 4c,d).

1281

1282
